## Microglia are necessary for normal functional development of adult-born neurons in the olfactory bulb

Jenelle Wallace<sup>1,2,3,4</sup>, Julia Lord<sup>3</sup>, Lasse Dissing-Olesen<sup>4,5</sup>, Beth Stevens<sup>4,5,6,7,\*</sup>, Venkatesh Murthy<sup>1,2,3,\*</sup>

<sup>1</sup>Molecules, Cells, and Organisms training program

<sup>2</sup>Center for Brain Science, Harvard University, Cambridge, MA 02138, USA

<sup>3</sup>Department of Molecular & Cellular Biology, Harvard University, Cambridge, MA 02138, USA

<sup>4</sup>Boston Children's Hospital, F.M. Kirby Neurobiology Center, Boston, MA, USA

<sup>5</sup>Harvard Medical School, Boston, MA, USA

<sup>6</sup>Stanley Center for Psychiatric Research, Broad Institute of MIT and Harvard, Cambridge, MA, USA

<sup>7</sup>Howard Hughes Medical Institute, Boston Children's Hospital, Boston, MA, USA

\*Correspondence: [beth.stevens@childrens.harvard.edu](mailto:beth.stevens@childrens.harvard.edu) (B.S.), [vmurthy@fas.harvard.edu](mailto:vmurthy@fas.harvard.edu) (V.M.)

### 1 Abstract

2 Microglia play key roles in regulating synapse development and refinement in the developing brain, but  
3 it is unknown whether they are similarly involved during adult neurogenesis. By transiently ablating  
4 microglia from the healthy adult mouse brain, we show that microglia are necessary for the normal  
5 functional development of adult-born granule cells (abGCs) in the olfactory bulb. Microglia ablation  
6 reduces the odor responses of developing, but not preexisting GCs *in vivo* in both awake and  
7 anesthetized mice. Microglia preferentially target their motile processes to interact with mushroom  
8 spines on abGCs, and when microglia are absent, abGCs develop smaller spines and receive weaker  
9 excitatory synaptic inputs. These results suggest that microglia promote the development of excitatory  
10 synapses onto developing abGCs, which may impact the function of these cells in the olfactory circuit.

11

### 12 Introduction

13 Microglia are critically important for normal brain development in the embryonic and early postnatal  
14 stages (Hammond et al., 2018). Originally thought to be primarily involved in injury and disease, many  
15 recent studies have implicated microglia in diverse neurodevelopmental functions (Tremblay et al.,  
16 2011)(Salter and Beggs, 2014)(Wu et al., 2015)(Hong et al., 2016). However, much less is known about  
17 what role microglia might play in the healthy adult brain, even during the process of adult neurogenesis,  
18 which can be thought of as an extension of developmental processes throughout the lifespan.

19 During early postnatal development, microglia have been implicated in the regulation of  
20 synaptic development, including activity-dependent synaptic pruning (Stevens et al., 2007)(Schafer et

21 al., 2012) (Paolicelli et al., 2011)(Gunner et al., 2019) on one hand and promotion of synaptic  
22 development and maturation on the other (Hoshiko et al., 2012)(Zhan et al., 2014)(Miyamoto et al.,  
23 2016)(Nakayama et al., 2018). Although microglia seem well-positioned to perform similar roles to  
24 facilitate the integration of adult-born neurons into circuits in the adult brain in the dentate gyrus (DG)  
25 and olfactory bulb (OB) (Ekdahl, 2012)(Rodríguez-Iglesias et al., 2019), most studies on microglial  
26 regulation of adult neurogenesis to date have focused on early stages of the process occurring in the  
27 neurogenic niches. For example, hippocampal adult neurogenesis is impaired in models of  
28 neuroinflammation (Monje et al., 2003)(Ekdahl et al., 2003) and in immune-deficient mice (Ziv et al.,  
29 2006). Microglia regulate adult neurogenesis in the subgranular zone of the DG through ongoing  
30 phagocytosis of apoptotic neuroblasts (Sierra et al., 2010), although they do not seem to be similarly  
31 involved in the subventricular zone (SVZ) or rostral migratory stream (RMS) (Kyle et al., 2019) (but see  
32 (Ribeiro Xavier et al., 2015)).

33 Most of what is known about microglial involvement in later stages of neurogenesis is based on  
34 injury and disease models. Microglial activation via sensory deafferentation in the OB decreases the  
35 number of adult-born neurons (Lazarini et al., 2012) and their spine density (Denizet et al., 2016). In  
36 addition, lipopolysaccharide injection or CX3CR1 knockout activates microglia in the hippocampus and  
37 alters both inhibitory (Jakubs et al., 2008) and excitatory (Bolós et al., 2018) synapses onto adult-born  
38 neurons in the DG. These studies suggest that microglia can modulate the synaptic integration of adult-  
39 born neurons under inflammatory conditions, but raise the question of whether they are similarly  
40 involved in the healthy adult brain.

41 A recent study documented increased activity in principal neurons in the OB after microglia  
42 ablation (Reshef et al., 2017). Here we investigate the cellular and circuit mechanisms behind this effect  
43 and demonstrate that microglia ablation reduces activity in adult-born granule cells (abGCs) that make  
44 inhibitory connections with principal cells in the OB. We show that microglia normally interact with  
45 spines in developing abGCs, and the volume of these spines is reduced when microglia are ablated. This  
46 is accompanied by a reduction in the amplitude of excitatory but not inhibitory inputs to abGCs,  
47 suggesting that microglia are essential for proper integration of abGCs in adult circuits.

48

## 49 **Results**

### 50 *Microglia preferentially interact with mushroom spines on abGCs*

51 We labeled cohorts of abGCs born within a short time window using lentiviral injection into the  
52 RMS (Consiglio et al., 2004)(Livneh and Mizrahi, 2012). To visualize interactions between microglia and

53 abGCs, we performed time-lapse *in vivo* two-photon imaging of the dendrites of dTomato-labeled abGCs  
54 in the external plexiform layer (EPL) of the OB over the first four weeks after injection in CX3CR1-GFP +/-  
55 mice, in which microglia are labeled with GFP (Figure 1a). Consistent with previous observations  
56 (Nimmerjahn et al., 2005)(Tremblay et al., 2010), we found that microglial processes were highly motile  
57 and occasionally appeared in close proximity to labeled dendritic spines (Figure 1b). To quantify whether  
58 microglia preferentially interact with dendritic spines (defined as colocalization of a microglial process  
59 with a spine head, meaning the two are within the diffraction limit of our microscope) on abGCs  
60 compared to encountering them by chance during the course of continuous motility, we compared the  
61 frequency of interactions between microglial processes and spine heads in the actual imaging data with  
62 the frequency of interactions in an image in which the microglia channel was arbitrarily shifted with  
63 respect to the dendritic imaging channel (“Offset”).

64 Microglia exhibited an impressive degree of motility, interacting with 38.0% of abGC dendritic  
65 spines classified as “mushroom” spines (Figure 1c) and 26.8% of spines classified as “filopodial” spines  
66 (Figure 1H) during the course of our 30-90 minute imaging sessions, which was slightly but not  
67 significantly higher than the percentages calculated in the offset data, 34.0% and 24.6%, respectively  
68 (Mushroom: Chi square test  $\chi^2 = 1.90$ ,  $p = 0.17$  and Filopodial:  $\chi^2 = 0.29$ ,  $p = 0.29$ ). However, we found  
69 that microglia spent about twice as much total time interacting with mushroom spines in the real  
70 compared to the offset data (Data: median 0.24 min/10 min vs. Offset: 0.13 min/10 min,  $p = 0.02$ )  
71 (Figure 1d). An increase in the number of interactions (Data: 0.14 interactions/10 min vs. Offset: 0.09  
72 interactions/10 min) was mostly responsible for this difference, since the number of interactions ( $p =$   
73 0.014) (Figure 1e) but not the length of the interactions ( $p = 0.80$ )(Figure 1f) was significantly higher than  
74 chance. There was no difference in the percent of the spine covered by the microglial process during the  
75 interaction ( $p = 0.93$ )(Figure 1g). In contrast, microglia did not interact with filopodial spines at levels  
76 above chance (Figure 1i-l).

77 These results suggest that microglia specifically interact with spines that likely contain functional  
78 synapses (Whitman and Greer, 2007), positioning them to influence synaptic stabilization and  
79 maturation during the early development of abGCs.

80

### 81 *Odor responses are reduced in abGCs that mature in the absence of microglia*

82 To assess whether microglial interactions are essential for the functional development of abGCs,  
83 we ablated microglia during the entire timecourse of abGC development, beginning three weeks before  
84 lentiviral labeling (Figure 2a). Microglial ablation using the CSF1R inhibitor PLX5622 formulated in chow

85 as previously described (Elmore et al., 2014) efficiently ablated microglia from the OB (85% ablation as  
86 assessed by immunostaining, 96% ablation as assessed by FACS) within one week and ablation could be  
87 maintained at similar levels for up to nine weeks with ongoing delivery (Figure 2b, Figure 2—figure  
88 supplements 1 and 2).

89         At five to six weeks post injection, we used two-photon imaging to visualize abGC dendrites *in*  
90 *vivo*. Microglia ablation did not affect the overall number of adult-born neurons in the OB (Figure 2—  
91 figure supplement 3), consistent with other reports, (Reshef et al., 2017)(Kyle et al., 2019) and we could  
92 identify dTomato-labeled abGC dendrites with similar gross morphology in control and PLX-treated  
93 mice. We recorded calcium responses in abGC dendrites in anesthetized mice to a panel of 16  
94 monomolecular odors (Table 1) while simultaneously imaging morphology in the dTomato channel to  
95 aid in region of interest identification and image alignment (Figure 2c). AbGC responses to odors were  
96 sparse as previously described (Figure 2d) (Wallace et al., 2017), but across the population we could  
97 identify dendrites responding to most of the odors in our panel (Figure 2e). We characterized responses  
98 by taking the mean  $\Delta F/F_0$  value across a five-second period following the onset of a two-second odor  
99 stimulus and plotted the cumulative distribution of dendritic responses across all odors. The  
100 distribution was shifted left towards lower responsiveness in PLX-treated mice ( $p = 2.56e-08$ ) while the  
101 noise distributions constructed from blank trials were not different ( $p = 0.96$ )(Figure 2f). Dendrites in  
102 PLX-treated mice also responded to fewer odors (for threshold response criteria, see Methods) (Control:  
103 2 odors, PLX: 1 odor,  $p = 4.86e-04$ ) (Figure 2g). We also found that median lifetime sparseness (Willmore  
104 and Tolhurst, 2001) was decreased in dendrites in PLX-treated mice (Control: 0.18, PLX: 0.067,  $p = 4.18e-$   
105 04), again suggesting a sparser representation of odors in PLX-treated mice (Figure 2h). These effects  
106 were also significant across mice, with lower median response amplitudes in PLX-treated mice (Control:  
107 0.13, PLX: 0.067,  $p = 0.048$ ) (Figure 2i). However, there was no difference in the median amplitude of  
108 responses above threshold (Control: 1.25, PLX: 1.32,  $p = 0.76$ ) (Figure 2—figure supplement 4),  
109 suggesting that the difference in overall responses was mostly mediated by an increase in the  
110 proportion of dendrites that did not respond to any of the odors in our panel, which was significantly  
111 higher in PLX-treated mice (Control: 0.21, PLX: 0.35,  $p = 0.030$ ) (Figure 2—figure supplement 4).

112         While imaging in anesthetized mice allows better control of breathing rate, brain motion, and  
113 possible motivational influences on brain state, granule cell odor representation is significantly different  
114 in awake mice (Kato et al., 2012)(Wienisch and Murthy, 2016)(Wallace et al., 2017). Therefore, we also  
115 imaged abGC dendrites in awake mice and found similar effects as in anesthetized mice (Figure 3A,  
116 Figure 3—figure supplement 1), with dendrites in PLX-treated mice having lower responsiveness ( $p =$

117 0.037) (Figure 3B), responding to a lower median number of odors (Control: 1, PLX: 0,  $p = 0.061$ ) (Figure  
118 3C) and having lower lifetime sparseness (Control: 0.067, PLX: 0,  $p = 0.069$ ) (Figure 3C). Interestingly,  
119 while response timecourses were similar between control and PLX-treated mice in the anesthetized  
120 state ( $p = 0.30$ ), allowing us to characterize responses with a simple mean across the odor analysis  
121 period, principal components analysis revealed different response time courses in awake mice ( $p =$   
122 0.004) (Figure 3—figure supplement 2). These differences were likely not due to changes in active  
123 sampling of odors since sniffing rates were not different during baseline or odor presentation periods  
124 (Baseline: Control = 3.49 Hz, PLX = 3.52 Hz,  $p = 0.91$ ; Odor: Control = 4.00 Hz, PLX = 3.94 Hz,  $p = 0.81$ )  
125 (Figure 3—figure supplement 3). To ensure that our analysis of response amplitudes was not  
126 complicated by this possible change in response timing, we also applied an event detection analysis  
127 method to the awake data and found similar results (Figure 3—figure supplement 2) with dendrites in  
128 PLX mice still characterized by responses to a lower median number of odors (Control: 1, PLX: 0,  $p =$   
129 0.037) (Figure 3—figure supplement 2).

130

### 131 *Microglia ablation after development has no effect on odor responses*

132 We next wondered whether the effect of microglia ablation was specific to developing abGCs or  
133 whether it might affect abGCs more generally. To address this question, we modified our experimental  
134 timeline to label abGCs and wait three months for them to mature fully (Figure 4a) before imaging their  
135 responses to the same set of odors (Figure 4b) in the same mice before and after three weeks of  
136 PLX5622. In this case we found no significant differences in the distribution of responses ( $p =$   
137 0.89)(Figure 4c), median number of odors evoking a significant response (Control: 1, PLX: 1,  $p = 0.89$ )  
138 (Figure 4d), or lifetime sparseness (Control: 0.067, PLX: 0.067,  $p = 0.99$ ). We verified that our imaging  
139 paradigm was stable since there was also no change in responses when we imaged the same mice for  
140 two sessions three weeks apart without any PLX treatment (Figure 4—figure supplement 1). Even after 9  
141 weeks of PLX treatment, the level of responsiveness remained stable in mature abGCs (Figure 4—figure  
142 supplement 2).

### 143 *Synapse development in abGCs that mature in the absence of microglia*

144 Since we found that microglia ablation reduces the functional responses of abGCs, we wondered  
145 if there were accompanying changes in excitatory synapses made on abGCs. We first studied spines in  
146 the EPL since our *in vivo* imaging showed that microglia preferentially interact with mushroom spines in  
147 this area. Four weeks after lentiviral labeling, we examined spines on apical dendrites in abGCs in

148 control and PLX-treated mice (Figure 5a,b). We found no significant difference in spine density (Control:  
149 0.31 spines/ $\mu\text{m}$ , PLX: 0.42 spines/ $\mu\text{m}$ ,  $p = 0.17$ ) (Figure 5c), but the distribution of spine head volume  
150 was shifted towards smaller volumes in PLX-treated mice ( $p = 0.0044$ ) (Figure 5d), although this did not  
151 reach significance when averaging across all spines in each cell (Control median:  $0.39 \mu\text{m}^3$ , PLX median:  
152  $0.30 \mu\text{m}^3$ ,  $p = 0.13$ ).

153 We next investigated the electrophysiological correlates of the observed differences in spine  
154 head size by recording spontaneous excitatory postsynaptic currents (sEPSCs) in abGCs with the same  
155 timeline as our *in vivo* imaging experiments, namely microglia ablation three weeks before lentiviral  
156 labeling, continuing until electrophysiological recordings from labeled cells at five to six weeks post  
157 injection (Figure 6a,b). We found a similar frequency of sEPSCs in cells from control and PLX-treated  
158 mice (Control median: 31.7 Hz, PLX median: 31.3 Hz,  $p = 0.93$ ) (Figure 6c), but their amplitude was  
159 reduced (Control median: 9.9 pA, PLX median: 8.6 pA,  $p = 0.019$ ) (Figure 6c). Passive membrane  
160 properties including membrane resistance (Control: 597 M $\Omega$ , PLX: 532 M $\Omega$ ,  $p = 0.31$ ) and capacitance  
161 (Control: 14.2 pF, PLX: 13.6 pF,  $p = 0.61$ ) were unchanged, signifying no differences in cell surface area or  
162 resting membrane properties (Figure 6—figure supplement 1). We also confirmed that our recording  
163 conditions were consistent by verifying that series resistance and the distance of the recorded cells from  
164 the mitral cell layer were not different between groups (Figure 6—figure supplement 1).

165 To check whether there might be accompanying changes in inhibition that could offset or  
166 augment the observed changes in excitation, we also recorded spontaneous inhibitory postsynaptic  
167 currents (sIPSCs) in the same cells (Figure 6e). We found no difference in the frequency ( $p = 0.76$ )(Figure  
168 6f) or amplitude of sIPSCs ( $p = 0.39$ )(Figure 6F), suggesting that the observed differences in abGC  
169 functional responses are due to weaker excitatory inputs without noticeable accompanying changes in  
170 inhibition.

#### 171 *Microglia ablation after development has no effect on synaptic inputs*

172 Since there was no significant change in functional responses in abGCs that matured before  
173 microglia ablation, we checked whether synaptic inputs were also unchanged in this condition using the  
174 same experimental timeline as before and recording sEPSCs in abGCs that experienced three weeks of  
175 microglia ablation after three months of maturation (Figure 7a). There was no significant change in the  
176 frequency ( $p = 0.21$ )(Figure 7b) or amplitude of sEPSCs ( $p = 0.68$ )(Figure 7c). Series resistance was  
177 similarly unchanged (Figure 7—figure supplement 1) as were inhibitory inputs (Figure 7—figure

178 supplement 2). These results suggest that microglia ablation only affects synaptic inputs to abGCs when  
179 it occurs during the first five to six weeks of the cells' development rather than after maturation.

180

## 181 **Discussion**

182 We delineate an important role for microglia in the regulation of adult-born neuron integration  
183 in the healthy adult brain. Our study adds to the growing literature documenting significant  
184 physiological and/or behavioral effects following microglia ablation from the healthy adult brain  
185 (Parkhurst et al., 2013)(Torres et al., 2016)(Reshef et al., 2017). Importantly, our study is the first to link  
186 microglia ablation to changes in the *in vivo* activity and functional inputs of a specific affected cell  
187 population. We show that eliminating microglia has functional consequences for abGCs incorporating  
188 into the circuitry of the OB, reducing their responses to stimuli. Furthermore, we go on to investigate  
189 the physiological mechanisms and show that the dampened responses we observe are likely a  
190 consequence of reduced spine volume and weaker excitatory inputs in neurons that develop in the  
191 absence of microglia.

### 192 *Methodological considerations*

193 There are several technical caveats that must be acknowledged to allow proper interpretation of  
194 our study. While ablation of microglia with PLX5622 is highly efficient, it is unknown in what state the  
195 small remaining percentage of microglia may be. This is particularly relevant for adult neurogenesis  
196 because it is known that inflammation negatively regulates the integration of adult-born neurons.  
197 Encouragingly, there seems to be no upregulation of inflammatory markers with PLX treatment (Elmore  
198 et al., 2014)(Reshef et al., 2017). Furthermore, inflammation in the OB has been shown to generally  
199 affect adult-born neuron numbers (Lazarini et al., 2012) and spine density (Denizet et al., 2016) rather  
200 than specifically excitatory synapse strength as we show here, so it is unlikely that undetected  
201 inflammation relating to microglia ablation can account for the results we observe.

202 We also note that microglia ablation with PLX5622 is brain-wide. AbGCs receive local inputs  
203 from within the OB as well as feedback from other cortical areas and neuromodulatory inputs(Lepousez  
204 et al., 2013), so we cannot unambiguously attribute the effects on abGCs to changes within the OB.  
205 Future work will be necessary to investigate whether there is a change in the balance of distal  
206 (predominantly feedforward) and proximal (mostly feedback) inputs or instead a more general effect on  
207 excitatory synapse maturation and/or maintenance.



208 *Timing of microglia ablation*

209 It should be noted that while our results suggest that the effect of microglia ablation is specific  
210 to developing abGCs since our results with microglia ablation after abGC development did not reach  
211 statistical significance in most cases, we saw similar trends in reduced responses and excitatory inputs  
212 regardless of the timing of microglia ablation. This could be because lentiviral labeling is an imperfect  
213 method for isolating a single cohort of abGCs (so some abGCs in the “after development group” may still  
214 be at an earlier stage of development – see discussion of newcomer cells in (Wallace et al., 2017)).  
215 Another possibility is that microglia ablation also affects mature abGCs, although to a lesser extent than  
216 developing abGCs. This could be because microglia may be involved in the general maintenance or  
217 strengthening of newly formed excitatory synapses in GCs, and even mature GCs have high rates of  
218 synapse formation (and elimination) compared to cells in other brain regions (Sailor et al., 2016). In this  
219 scheme, developing abGCs would demonstrate the most significant phenotype due to their higher rates  
220 of spine dynamics (Sailor et al., 2016), but even mature GCs might accrue smaller effects over time.

221 The larger effect of microglia ablation on developing rather than mature adult-born neurons  
222 highlights the role of microglia during developmental stages and may explain why some studies have not  
223 found significant effects of microglia ablation in other areas of the healthy adult brain (Elmore et al.,  
224 2014)(Torres et al., 2016).

225

226 *Microglia-neuron interactions in the adult brain*

227 Though several studies have examined microglial motility (Nimmerjahn et al., 2005) and  
228 interactions between microglia and neuronal elements (Wake et al., 2009)(Tremblay et al., 2010)(Sipe et  
229 al., 2016), it has not been rigorously established that microglia interact with synapses more often than  
230 would be expected by chance, given the dense synaptic milieu of the adult brain and the high degree of  
231 microglial process motility. Using automated methods to segment microglial processes from *in vivo* two  
232 photon time lapse imaging experiments and shuffle the resulting images for comparison, we  
233 demonstrated targeted motility towards mushroom spines on abGCs, which are likely to contain  
234 established excitatory synapses (Whitman and Greer, 2007). In the absence of microglia, these spines  
235 have reduced volume, and this corresponds to weaker excitatory synapses. Signaling through microglial  
236 CX3CR1 may be involved in microglial interactions with spines on abGCs (Zhan et al., 2014)(Reshef et al.,  
237 2017), but future work should investigate how this is related to the promotion of excitatory synapse  
238 strengthening. One possibility is that microglia may prune weaker synapses, allowing stronger synapses  
239 to strengthen further (Stevens et al., 2007)(Schafer et al., 2012) (Paolicelli et al., 2011). Consistent with



240 this hypothesis, we observed a trend towards an increase in spine density in microglia-ablated animals,  
241 which is likely accounted for by filopodial spines which did not have functional or stable synapses (since  
242 we did not see an accompanying increase in the frequency of synaptic currents in PLX-treated mice).  
243 Although we did not directly observe pruning of dendritic spines in abGCs in our time lapse imaging  
244 experiments, it remains possible that microglia could prune presynaptic elements (Schafer et al.,  
245 2012)(Gunner et al., 2019)(which we did not image) or that our frame rate was too slow to observe such  
246 events (Weinhard et al., 2018). Alternatively, microglia may be involved in synaptic strengthening rather  
247 than pruning in this system through yet-uncovered mechanisms.

248

#### 249 *AbGCs in the olfactory circuit*

250 AbGCs become responsive to odor stimuli soon after they arrive in the OB and then undergo a  
251 period of functional refinement during which their initially broadly tuned responses become more  
252 selective (Wallace et al., 2017). The fact that we observe reduced odor responses in six-week-old abGCs  
253 in microglia-ablated mice could suggest either a defect in synaptic formation and strengthening that  
254 begins early and persists throughout the cells' development or a period of normal development  
255 followed by a defect in synapse strengthening or refinement that causes fewer odor responses to be  
256 maintained at maturity. Further experiments tracking the timecourse of synaptic development and odor  
257 responses in microglia-ablated animals will be necessary to disambiguate these possibilities.

258

#### 259 *Consequences for olfactory processing*

260 The reduced activity that we observe in mature abGCs after microglia ablation is consistent with  
261 increased activity in the principal cells they inhibit (Reshef et al., 2017). Since reduced inhibition from  
262 GCs to OB principal neurons has been directly linked to an increase in the time needed to discriminate  
263 odors in challenging olfactory tasks (Abraham et al., 2010), this alteration in the OB circuitry could have  
264 functional consequences (Egger and Urban, 2006). Furthermore, given that abGCs may have an outsized  
265 role in the plasticity that underlies complex olfactory behaviors (Breton-Provencher et al., 2009)(Li et al.,  
266 2018) (Mandairon et al., 2018), microglial regulation of their development may be crucial to ongoing  
267 plasticity in the olfactory system.

268

269 **Author contributions**

270 JW performed two-photon imaging, electrophysiology, and confocal imaging experiments, analyzed the  
271 data, and prepared the figures. JW and JL performed spine quantification experiments (Figure 5). LDO  
272 performed flow cytometry experiments and analyzed flow cytometry data. JW, VM, and BS designed the  
273 study and wrote the manuscript. VM and BS supervised the work.

274 **Acknowledgements**

275 This work was supported by a grant from the NIH (R01 DC013329) to VNM. JLW was supported by the  
276 NSF GRFP (DGE1144152) and NRSA (F31 DC016482) from the NIDCD. BS was supported by NIH  
277 R01NS092578 and Merkin Award, Broad Institute. Microscopy on fixed tissue samples was performed at  
278 the Harvard Center for Biological Imaging where JLW was supported by the Simmons Family Award. We  
279 thank Martin Wienisch, Joseph Zak, Vikrant Kapoor, and Julien Grimaud from the Murthy lab for  
280 assistance with equipment setup and training in relevant techniques and the members of the Murthy  
281 and Stevens labs for productive discussions. Thanks to Arnaud Frouin and Alanna Carey from the  
282 Stevens lab for assistance with cloning and production of lentiviral plasmids. We thank Chen Wang and  
283 the Viral Core at Boston Children's Hospital for production of lentivirus.

284 **References**

- 285 Abraham NM, Egger V, Shimshek DR, Renden R, Fukunaga I, Sprengel R, Seeburg PH, Klugmann M,  
286 Margrie TW, Schaefer AT, Kuner T. 2010. Synaptic inhibition in the olfactory bulb accelerates odor  
287 discrimination in mice. *Neuron* **65**:399–411. doi:10.1016/j.neuron.2010.01.009
- 288 Bolós M, Perea JR, Terreros-Roncal J, Pallas-Bazarra N, Jurado-Arjona J, Ávila J, Llorens-Martín M. 2018.  
289 Absence of microglial CX3CR1 impairs the synaptic integration of adult-born hippocampal granule  
290 neurons. *Brain Behav Immun* **68**:76–89. doi:10.1016/j.bbi.2017.10.002
- 291 Breton-Provencher V, Lemasson M, Peralta MR, Saghatelian A. 2009. Interneurons produced in  
292 adulthood are required for the normal functioning of the olfactory bulb network and for the  
293 execution of selected olfactory behaviors. *J Neurosci* **29**:15245–15257.  
294 doi:10.1523/JNEUROSCI.3606-09.2009
- 295 Consiglio A, Gritti A, Dolcetta D, Follenzi A, Bordignon C, Gage FH, Vescovi AL, Naldini L. 2004. Robust in  
296 vivo gene transfer into adult mammalian neural stem cells by lentiviral vectors. *Proc Natl Acad Sci*  
297 *U S A* **101**:14835–14840. doi:10.1073/pnas.0404180101
- 298 Denizet M, Cotter L, Lledo P-M, Lazarini F. 2016. Sensory deprivation increases phagocytosis of adult-  
299 born neurons by activated microglia in the olfactory bulb. *Brain Behav Immun* **6**–11.  
300 doi:10.1016/j.bbi.2016.09.015
- 301 Egger V, Urban NN. 2006. Dynamic connectivity in the mitral cell-granule cell microcircuit. *Semin Cell Dev*  
302 *Biol* **17**:424–432. doi:10.1016/j.semcdb.2006.04.006
- 303 Ekdahl CT. 2012. Microglial activation - tuning and pruning adult neurogenesis. *Front Pharmacol* **3**:41.  
304 doi:10.3389/fphar.2012.00041
- 305 Ekdahl CT, Claasen J, Bonde S, Kokaia Z, Lindvall O. 2003. Inflammation is detrimental for neurogenesis  
306 in adult brain **100**.
- 307 Elmore MRP, Najafi AR, Koike M a, Dagher NN, Spangenberg EE, Rice R a, Kitazawa M, Matusow B,  
308 Nguyen H, West BL, Green KN. 2014. Colony-stimulating factor 1 receptor signaling is necessary for  
309 microglia viability, unmasking a microglia progenitor cell in the adult brain. *Neuron* **82**:380–97.  
310 doi:10.1016/j.neuron.2014.02.040
- 311 Gunner G, Cheadle L, Johnson KM, Ayata P, Badimon A, Mondo E, Nagy MA, Liu L, Bemiller SM, Kim K,  
312 Lira SA, Lamb BT, Tapper AR, Ransohoff RM, Greenberg ME, Schaefer A, Schafer DP. 2019. Sensory  
313 lesioning induces microglial synapse elimination via ADAM10 and fractalkine signaling. *Nat*  
314 *Neurosci* **22**. doi:10.1038/s41593-019-0419-y
- 315 Hammond TR, Robinton D, Stevens B. 2018. Microglia and the Brain: Complementary Partners in

- 316 Development and Disease. *Annu Rev Cell Dev Biol* **34**:523–544. doi:10.1146/annurev-cellbio-  
317 100616-060509
- 318 Hong S, Dissing-Olesen L, Stevens B. 2016. New insights on the role of microglia in synaptic pruning in  
319 health and disease. *Curr Opin Neurobiol* **36**:128–134. doi:10.1016/j.conb.2015.12.004
- 320 Hoshiko M, Arnoux I, Avignone E, Yamamoto N, Audinat E. 2012. Deficiency of the microglial receptor  
321 CX3CR1 impairs postnatal functional development of thalamocortical synapses in the barrel cortex.  
322 *J Neurosci* **32**:15106–11. doi:10.1523/JNEUROSCI.1167-12.2012
- 323 Jakubs K, Bonde S, Iosif RE, Ekdahl CT, Kokaia Z, Kokaia M, Lindvall O. 2008. Inflammation regulates  
324 functional integration of neurons born in adult brain. *J Neurosci* **28**:12477–88.  
325 doi:10.1523/JNEUROSCI.3240-08.2008
- 326 Kato HK, Chu MW, Isaacson JS, Komiyama T. 2012. Dynamic sensory representations in the olfactory  
327 bulb: modulation by wakefulness and experience. *Neuron* **76**:962–75.  
328 doi:10.1016/j.neuron.2012.09.037
- 329 Kyle J, Wu M, Gourzi S, Tsirka SE. 2019. Proliferation and Differentiation in the Adult Subventricular Zone  
330 Are Not Affected by CSF1R Inhibition. *Front Cell Neurosci* **13**:1–10. doi:10.3389/fncel.2019.00097
- 331 Lazarini F, Gabellec M-M, Torquet N, Lledo P-M. 2012. Early activation of microglia triggers long-lasting  
332 impairment of adult neurogenesis in the olfactory bulb. *J Neurosci* **32**:3652–64.  
333 doi:10.1523/JNEUROSCI.6394-11.2012
- 334 Lepousez G, Valley MT, Lledo P-M. 2013. The impact of adult neurogenesis on olfactory bulb circuits and  
335 computations. *Annu Rev Physiol* **75**:339–63. doi:10.1146/annurev-physiol-030212-183731
- 336 Livneh Y, Mizrahi A. 2012. Experience-dependent plasticity of mature adult-born neurons. *Nat Neurosci*  
337 **15**:26–8. doi:10.1038/nn.2980
- 338 Miyamoto A, Wake H, Ishikawa AW, Eto K, Shibata K, Murakoshi H, Koizumi S, Moorhouse AJ, Yoshimura  
339 Y, Nabekura J. 2016. Microglia contact induces synapse formation in developing somatosensory  
340 cortex. *Nat Commun* **7**:12540. doi:10.1038/ncomms12540
- 341 Monje ML, Toda H, Palmer TD. 2003. Inflammatory blockade restores adult hippocampal neurogenesis.  
342 *Science* **302**:1760–5. doi:10.1126/science.1088417
- 343 Nakayama H, Abe M, Morimoto C, Iida T, Okabe S, Sakimura K, Hashimoto K. 2018. Microglia permit  
344 climbing fiber elimination by promoting GABAergic inhibition in the developing cerebellum. *Nat*  
345 *Commun* **9**:1–2. doi:10.1038/s41467-018-05100-z
- 346 Nimmerjahn A, Kirchhoff F, Helmchen F. 2005. Resting microglial cells are highly dynamic surveillants of  
347 brain parenchyma in vivo. *Science* **308**:1314–8. doi:10.1126/science.1110647

- 348 Paolicelli RC, Bolasco G, Pagani F, Maggi L, Scianni M, Panzanelli P, Giustetto M, Ferreira TA, Guiducci E,  
349 Dumas L, Ragozzino D, Gross CT. 2011. Synaptic pruning by microglia is necessary for normal brain  
350 development. *Science* **333**:1456–8. doi:10.1126/science.1202529
- 351 Reshef R, Kudryavitskaya E, Shani-Narkiss H, Isaacson B, Rimmerman N, Mizrahi A, Yirmiya R. 2017. The  
352 role of microglia and their CX3CR1 signaling in adult neurogenesis in the olfactory bulb. *Elife* **6**:1–  
353 30. doi:10.7554/eLife.30809
- 354 Ribeiro Xavier a. L, Kress BT, Goldman S a., Lacerda de Menezes JR, Nedergaard M. 2015. A Distinct  
355 Population of Microglia Supports Adult Neurogenesis in the Subventricular Zone. *J Neurosci*  
356 **35**:11848–11861. doi:10.1523/JNEUROSCI.1217-15.2015
- 357 Rodríguez-Iglesias N, Sierra A, Valero J. 2019. Rewiring of Memory Circuits: Connecting Adult Newborn  
358 Neurons With the Help of Microglia. *Front Cell Dev Biol* **7**:1–20. doi:10.3389/fcell.2019.00024
- 359 Sailor KA, Valley MT, Wiechert MT, Riecke H, Sun GJ, Adams W, Dennis JC, Sharafi S, Ming G, Song H,  
360 Lledo P-M. 2016. Persistent Structural Plasticity Optimizes Sensory Information Processing in the  
361 Olfactory Bulb. *Neuron* **91**:384–396. doi:10.1016/j.neuron.2016.06.004
- 362 Salter MW, Beggs S. 2014. Sublime Microglia: Expanding Roles for the Guardians of the CNS. *Cell*  
363 **158**:15–24. doi:10.1016/j.cell.2014.06.008
- 364 Schafer DP, Lehrman EK, Kautzman AG, Koyama R, Mardinly AR, Yamasaki R, Ransohoff RM, Greenberg  
365 ME, Barres B a, Stevens B. 2012. Microglia sculpt postnatal neural circuits in an activity and  
366 complement-dependent manner. *Neuron* **74**:691–705. doi:10.1016/j.neuron.2012.03.026
- 367 Sierra A, Encinas JM, Deudero JJP, Chancey JH, Enikolopov G, Overstreet-Wadiche LS, Tsirka SE, Maletic-  
368 Savatic M. 2010. Microglia shape adult hippocampal neurogenesis through apoptosis-coupled  
369 phagocytosis. *Cell Stem Cell* **7**:483–95. doi:10.1016/j.stem.2010.08.014
- 370 Sipe GO, Lowery, RL, Tremblay M-È, Kelly EA, Lamantia CE, Majewska AK. 2016. Microglial P2Y12 is  
371 necessary for synaptic plasticity in mouse visual cortex. *Nat Commun* **7**:10905.  
372 doi:10.1038/ncomms10905
- 373 Stevens B, Allen NJ, Vazquez LE, Howell GR, Christopherson KS, Nouri N, Micheva KD, Mehalow AK,  
374 Huberman AD, Stafford B, Sher A, Litke AM, Lambris JD, Smith SJ, John SWM, Barres B a. 2007. The  
375 classical complement cascade mediates CNS synapse elimination. *Cell* **131**:1164–78.  
376 doi:10.1016/j.cell.2007.10.036
- 377 Torres L, Danver J, Ji K, Miyauchi JT, Chen D, Anderson ME, West BL, Robinson JK, Tsirka SE. 2016. Brain ,  
378 Behavior , and Immunity Dynamic microglial modulation of spatial learning and social behavior.  
379 *Brain Behav Immun* **55**:6–16. doi:10.1016/j.bbi.2015.09.001

- 380 Tremblay M-È, Lowery RL, Majewska AK. 2010. Microglial interactions with synapses are modulated by  
381 visual experience. *PLoS Biol* **8**:e1000527. doi:10.1371/journal.pbio.1000527
- 382 Tremblay M-È, Stevens B, Sierra A, Wake H, Bessis A, Nimmerjahn A. 2011. The role of microglia in the  
383 healthy brain. *J Neurosci* **31**:16064–9. doi:10.1523/JNEUROSCI.4158-11.2011
- 384 Wake H, Moorhouse AJ, Jinno S, Kohsaka S, Nabekura J. 2009. Resting microglia directly monitor the  
385 functional state of synapses in vivo and determine the fate of ischemic terminals. *J Neurosci*  
386 **29**:3974–80. doi:10.1523/JNEUROSCI.4363-08.2009
- 387 Wallace JL, Wienisch M, Murthy VN. 2017. Development and Refinement of Functional Properties of  
388 Adult-Born Neurons. *Neuron* **96**:883–896. doi:10.1016/j.neuron.2017.09.039
- 389 Weinhard L, Di Bartolomei G, Bolasco G, Machado P, Schieber NL, Neniskyte U, Exiga M, Vadisiute A,  
390 Raggioli A, Schertel A, Schwab Y, Gross CT. 2018. Microglia remodel synapses by presynaptic  
391 trogocytosis and spine head filopodia induction. *Nat Commun* **9**. doi:10.1038/s41467-018-03566-5
- 392 Whitman MC, Greer C a. 2007. Synaptic integration of adult-generated olfactory bulb granule cells: basal  
393 axodendritic centrifugal input precedes apical dendrodendritic local circuits. *J Neurosci* **27**:9951–  
394 61. doi:10.1523/JNEUROSCI.1633-07.2007
- 395 Wienisch M, Murthy VN. 2016. Population imaging at subcellular resolution supports specific and local  
396 inhibition by granule cells in the olfactory bulb. *Sci Rep* **6**:29308. doi:10.1038/srep29308
- 397 Wu Y, Dissing-Olesen L, MacVicar BA, Stevens B. 2015. Microglia: Dynamic Mediators of Synapse  
398 Development and Plasticity. *Trends Immunol* **36**:605–613. doi:10.1016/j.it.2015.08.008
- 399 Zhan Y, Paolicelli RC, Sforazzini F, Weinhard L, Bolasco G, Pagani F, Vyssotski AL, Bifone A, Gozzi A,  
400 Ragozzino D, Gross CT. 2014. Deficient neuron-microglia signaling results in impaired functional  
401 brain connectivity and social behavior. *Nat Neurosci* **17**:400–6. doi:10.1038/nn.3641
- 402 Ziv Y, Ron N, Butovsky O, Landa G, Sudai E, Greenberg N, Cohen H, Kipnis J, Schwartz M. 2006. Immune  
403 cells contribute to the maintenance of neurogenesis and spatial learning abilities in adulthood. *Nat*  
404 *Neurosci* **9**:268–275. doi:10.1038/nn1629
- 405

406 **Materials and methods**

407

408 **Mice**

409 Mice were C57BL/6J males (Jackson Laboratories) or CX3CR1-GFP heterozygotes (Jung et al., 2000) that  
410 were 8 to 12-weeks-old at the beginning of the experiment. Mice were singly housed after chronic  
411 cranial window implantation or housed with littermates for experiments that did not require an implant.  
412 In both cases, they were housed on a 12-hour reversed light/dark cycle after window implantation or  
413 viral injection. Littermates were randomly assigned to experimental groups (control vs. PLX). All  
414 procedures were performed using approved protocols in accordance with institutional (Harvard  
415 University Institutional Animal Care and Use Committee) and national guidelines.

416

417 **Viral vectors**

418 For all experiments involving lentiviral labeling of abGCs, we used a Tet-Off lentiviral system (Hioki et al.,  
419 2009) with one construct expressing the transactivator tTAad under control of a synapsin promotor  
420 (lenti-STB) and a second construct expressing structural and/or activity markers. For spine quantification  
421 in fixed tissue (Figure 5) and electrophysiology (Figures 6 and 7), we used lenti-STB and lenti-dTomato  
422 produced by the Boston Children's hospital. For imaging microglia-spine interactions (Figure 1), we used  
423 lenti-STB and lenti-dTomato-t2A-GCaMP5 and for all experiments measuring odor responses (Figures 2,  
424 3 and 4) we used lenti-STB and lenti-dTomato-t2A-GCaMP6s produced in house. VSV-G pseudotyped  
425 lentiviral vectors were produced by transfection of human embryonic kidney cells (HEK293FT) with  
426 third-generation lentivirus plasmids using lipofection (Mirus TransIT®-293). Supernatant was collected  
427 48 h after transfection and concentrated using ultrafiltration (Centricon Plus-20 PLGC centrifuge filter  
428 units).

429

430 **Lentiviral injections and cranial window surgeries**

431 Reproduced from (Wallace, Wienisch, & Murthy, 2017):

432 "Mice were anesthetized with an intraperitoneal injection of ketamine (100 mg/kg) and xylazine (10  
433 mg/kg) and body temperature was maintained at 37°C by a heating pad. A small craniotomy was made  
434 bilaterally over the RMS injection sites (coordinates from bregma: A +3.3, L +0.82, from the brain  
435 surface: V-2.9 and -2.7) and 250 nL of lentivirus (1:1 mixture of both constructs or 1:50 dilution of the  
436 tTA-containing construct to achieve sparser labeling for spine quantification in Figure 5) was injected at  
437 each of the two depths using a pulled glass micropipette (tip diameter approximately 10-20 µm)." For  
438 cranial windows, the surface of the brain was kept moist with artificial cerebrospinal fluid (125mMNaCl,  
439 5mMKCl, 10mMGlucose, 10mMHEPES, 2mM CaCl<sub>2</sub> and 2mM MgSO<sub>4</sub> [pH 7.4]) and Gelfoam (Patterson  
440 Veterinary) and a glass window consisting of two 3 mm No. 1 coverslips (Warner) glued together with  
441 optical glue (Norland Optical Adhesive 61) was implanted as previously described (Adam and Mizrahi,  
442 2011). For mice used for awake imaging, Kwik Sil (World Precision Instruments) was placed between the  
443 coverslip and the brain surface to reduce movement. In this case, the coverslip consisted of two 3 mm  
444 and one 4 mm No. 0 coverslips forming a plug (Dombeck & Tank, 2014) with the 4 mm coverslip cut to  
445 fit between the mouse's eyes. In both cases, the edges around the coverslip were sealed with Vetbond  
446 (3M) and then C&B-Metabond dental cement (Parkell, Inc.). A custom-made titanium headplate was  
447 cemented to the skull. After surgery, mice were treated with carprofen (6 mg/kg) every 24 hours and  
448 buprenorphine (0.1 mg/kg) every 12 hours for 5 days."

449



450 **Two photon imaging of microglia-spine interactions (Figure 1)**

451 A custom-built two-photon microscope (Wienisch et al., 2012) was used for in vivo imaging.  
452 Fluorophores were excited and imaged with a water immersion objective (20x, 0.95 NA, Olympus) at  
453 950 nm using a Ti:Sapphire laser (Mai Tai HP, Spectra-Physics). The point spread function of the  
454 microscope was measured to be 0.66 x 0.66 x 2.26  $\mu\text{m}$ . Image acquisition and scanning were controlled  
455 by custom-written software in Labview. Emitted light was routed through two dichroic mirrors (680dxcr,  
456 Chroma and FF555- DiO2, Semrock) and collected by two photomultiplier tubes (R3896, Hamamatsu)  
457 using filters in the 500-550 nm range (green channel, FF01-525/50, Semrock) and 572-642 nm range (red  
458 channel, FF01-607/70, Semrock). Fields of view were 75x75  $\mu\text{m}$  square spanning 800x800 pixels. Z-stacks  
459 of approximately 30  $\mu\text{m}$  depth with a 1  $\mu\text{m}$  z step for both channels (16 bit) were taken every 3 minutes  
460 (0.5 Hz frame rate with 3x averaging during acquisition) for periods of 30-90 minutes. Two or three fields  
461 of view were imaged in each mouse.

462

463 **Analysis of microglia-spine interactions (Figure 1)**

464 Since both channels exhibited bleed-through with our imaging parameters, the ImageJ spectral unmixing  
465 plugin (Author: J. Walter) was used to calculate and apply unmixing matrices for each image stack prior  
466 to further analysis. In Fiji, spine heads were delineated manually for each time point in the frame where  
467 they appeared brightest using the oval or polygon tools and ROI Manager and classified as either  
468 mushroom (spines whose spine head was wider than the spine neck at all timepoints) or filopodial  
469 (without a well-defined head). The Weka segmentation plugin (Arganda-Carreras et al., 2017) was used  
470 to perform binary segmentation of microglial processes from background after training on 5 frames  
471 (that were fully segmented manually) selected to represent a variety of microglial morphologies and  
472 brightness variation across the three mice. To optimize our resolution, we segmented very  
473 conservatively by using z stacks to mark microglial processes only in the plane where they appeared  
474 brightest. This strategy combined with only delineating spine heads in the brightest frame means that  
475 we only detected the closest interactions between microglial processes and spine heads. The features  
476 chosen for segmentation training in Weka were Gaussian blur, Sobel filter, Hessian, and Difference of  
477 Gaussians. This approach allowed us to segment complex microglia morphology from background  
478 automatically in every image frame and obviated the need for corrections for bleaching or variations in  
479 brightness across different imaging fields. Imaging frames that were too dim to segment (usually due to  
480 loss of immersion water) were excluded. Each segmented image stack was checked manually to ensure  
481 that any residual bleed-through from the red channel did not appear in the segmentation. After  
482 segmentation, ROIs representing spine heads were loaded onto the segmented image and the measured  
483 mean value within each ROI at each timepoint (0 if there was no colocalization or up to 1 if all pixels  
484 were colocalized with a segmented microglial process) was measured and exported into Matlab for  
485 further analysis. For offset data, we took the same segmented image stack and translated it horizontally  
486 by half the total number of pixels before measuring the overlap with the same spine head ROIs. To  
487 produce Video 2, frames were first registered with the MultiStackReg plugin (Author: Brad Busse) based  
488 on the magenta channel and bleaching was corrected with histogram matching in ImageJ (these steps  
489 were not necessary for analysis because we segmented each image frame separately as described  
490 above).

491

492 **Two photon imaging of odor-evoked responses (Figures 2 and 4)**

493 Reproduced from (Wallace, Wienisch, & Murthy, 2017):

494 “Animals were anesthetized with an intraperitoneal injection of ketamine and xylazine (90% of dose  
495 used for surgery) and body temperature was maintained at 37°C by a heating pad. Frame rates were 4  
496 Hz, the pixel size was 0.5  $\mu\text{m}$ , and fields of view measured 150 x 150  $\mu\text{m}$ . To locate regions for imaging, a  
497 low magnification z stack (~300-500  $\mu\text{m}$  square) at slow scanning speed (usually 0.5 Hz) with a 1-2  $\mu\text{m}$  z  
498 step was taken from the surface of the dura to the granule cell layer. Planes with many dendrites  
499 perpendicular to the imaging axis were chosen for imaging during odor stimulation.”

500

### 501 **Two photon imaging in awake animals (Figure 3)**

502 Animals were water-restricted beginning 1-2 days before being handled and accustomed to head-  
503 fixation in a restraining tube (Guo et al., 2014) for 1-2 days with manual delivery of water rewards  
504 (approximately 30 minute sessions each). They were then acclimated to the sound of the scan mirrors  
505 and odor delivery (using the full odor set) on the day before imaging with manual delivery of water  
506 rewards before imaging and periodically between sets of repetitions. The same protocol was repeated  
507 for 1 or 2 days of imaging for each mouse.

508

### 509 **Odor stimulation**

510 Odor lists are found in Table 1. Odors (Sigma) were delivered with a custom-built 16 channel  
511 olfactometer at a nominal volumetric concentration of 16 % (v/v) in mineral oil and further diluted by 16  
512 times in air to a final concentration of approximately 1% (except for isoeugenol which was not diluted in  
513 the olfactometer and therefore had a final concentration of approximately 6.25%). Odors were  
514 presented for 2 s with an interstimulus interval of 40 s with 3-5 times repetitions. The order of odor  
515 delivery was not randomized. A “no odor” trial with the same parameters but in which no odor valve  
516 opened was included with each set of repetitions. Odors were delivered through a mask with balanced  
517 input and output air flow that also allowed us to record respiration (Grimaud & Murthy, 2018). The  
518 positioning of the mask was adjusted daily to ensure optimal signal to noise. A photoionization detector  
519 (miniPID, Aurora Scientific) was used to confirm that odor concentrations were consistent between trials  
520 with these parameters. Odors were replaced before each set of experiments.

521

### 522 **In vivo imaging analysis (Figures 2, 3, 4)**

523 Data were analyzed offline using custom-written scripts in MATLAB (Mathworks). Experimenters were  
524 blind to fluorescence changes during data analysis but not to experimental group.

#### 525 *Regions of interest (ROIs)*

526 Dendritic ROIs from abGCs were chosen based on average intensity projections in the dTomato channel  
527 as previously described (Wallace et al., 2017). Fields of view were non-overlapping and separated by at  
528 least 100  $\mu\text{m}$  to minimize the chance of the same dendrites appearing in multiple fields of view. Z stacks  
529 of each imaging region were taken with a 2  $\mu\text{m}$  z step from the surface of the dura down to the  
530 convergence of GC dendrites into a single apical dendrite. The density of labeling precluded tracing of all  
531 dendrites back to their parent cell, but we used these z stacks to ensure that multiple ROIs were not  
532 chosen from the same dendrite. Therefore, these data should be considered a sample from a population  
533 of dendrites rather than cells since some dendrites may have originated from the same cell. For ablation  
534 in abGCs after development (Figure 4), the same fields of view were imaged before and after PLX  
535 treatment. For Figure 4—Supplement 2, we chose matching ROIs for the two sessions (any ROIs without  
536 similar morphology between the two sessions were excluded as described previously (Wallace et al.,  
537 2017)) to quantify how much our imaging conditions changed between sessions without PLX treatment.

538 However, we opted to choose ROIs independently for Figure 4 since matching ROIs always results in the  
539 exclusion of many ROIs, reducing sample size.

#### 540 *Motion correction*

541 To correct for fast lateral motion and image drift, all image frames for a given field of view were aligned  
542 to the average of the first trial using cross-correlation based on rigid body translation (ImageJ plugin  
543 Moco)(Dubbs, Guevara, & Yuste, 2016). Frames with out of frame motion were removed based on the  
544 cosine similarity between each frame and the average intensity projection of the first trial (or the user-  
545 determined trial with the least motion for awake imaging). Image frames with cosine similarity that  
546 differed by more than 25% (30% for awake imaging) from the mean value for the user-determined best  
547 trial for that field of view or more than 20% (15% for awake imaging) from the mean of the baseline  
548 period for that trial were discarded. In some trials, immersion water dried up or laser power fluctuated,  
549 so trials were removed if their average brightness was less than half of the brightness of the average of  
550 the first three trials or if difference in brightness between the baseline and odor periods was greater  
551 than three times the standard deviation of brightness in the first trial. The entire trial was removed if,  
552 after these corrections, it contained less than 75% of the original frames during either the baseline or  
553 odor analysis period.

#### 554 *Fluorescence changes*

555 The average intensity in the GCaMP channel was calculated for each ROI, for each frame and for each  
556 odor. A response value for each cell-odor pair was calculated as the average  $\Delta F/F_0$  value over the odor  
557 analysis period (5 s following odor onset) where  $F_0$  represents the standard deviation of fluorescence  
558 during the baseline period. We used  $F_0$  because we found that in many cases the baseline GCaMP6s  
559 fluorescence was so low in abGC dendrites that we could not reliably subtract the background as  
560 described previously (Wallace et al., 2017). Bleaching was corrected by fitting a single exponential to the  
561 fluorescence during the baseline period and taking the value at the end of the baseline period as the  
562 baseline mean, only for ROIs where the fluorescence during the last 2.5 s of the baseline period was  
563 greater than 1.1 times the fluorescence during the first 2.5 s. If, after correction for bleaching, baseline  
564  $F_0$  was greater than 30% of the mean baseline fluorescence, that ROI was considered too noisy and was  
565 removed from the analysis.

#### 566 *Event analysis (Figure 3—Supplement 2)*

567 Events were detected separately in each trace using the calculated ROC threshold (see next section) and  
568 any frames that were included in an event in any repeat were averaged across all repeats to obtain a  
569 mean event trace and the mean value in a 1 second period around the peak in this mean trace was then  
570 calculated. For latency, the mean latency across repeats was calculated for all repeats that had detected  
571 events.

#### 572 *Thresholds*

573 For all figures where a threshold was applied to the data, thresholds were calculated based on the  
574 distribution of “no odor” trials. An area under the receiver operating curve analysis was performed and  
575 the lowest threshold yielding a 10% false positive rate was chosen. Thresholds were calculated for each  
576 figure by combining responses from both control and PLX-treated groups and performing ROC analysis  
577 on the combined data. For event detection, we used ROC analysis to find the optimal combined  
578 threshold for the number of frames and standard deviation above baseline and chose the threshold that  
579 gave closest to a 10% false positive rate.

#### 580 *Lifetime sparseness*

581 After applying a threshold to the data, we used the following equation to calculate lifetime sparseness:  
582 (Willmore and Tolhurst, 2001)

$$583 \quad LS = \frac{\left(\sum_{j=1}^m \frac{r_j}{m}\right)^2}{\left(\sum_{j=1}^m \frac{r_j^2}{m}\right)}$$

584 where  $m$  = number of odors,  $r_j$  = response of the neuron to odor  $j$ .

585 If all stimuli activate a cell nearly uniformly, LS will be close to 1, and if only a small fraction of the stimuli  
586 activate a cell significantly, LS will be close to 0. For any cells with all responses below threshold, we set  
587  $LS = 0$ , interpreting this as the sparsest possible representation.

#### 588 *Temporal dynamics*

589 Principal component analysis of the time course of responses was performed in Matlab using centered  
590 data and singular value decomposition as described previously (Wienisch & Murthy, 2016). To compare  
591 timecourses for the control and PLX-treated groups, principal components were calculated on each  
592 dataset (all traces from all cell-odor pairs) separately and the angle between the two spaces spanned by  
593 the coefficient vectors for the first three principal components from the beginning to the end of the  
594 odor analysis period was calculated. Then the group to which each trace belonged was shuffled 1,000  
595 times, and the angles between new coefficient vectors were calculated based on random division into  
596 two groups of the same size as the original datasets. The actual angle was then compared to this  
597 distribution to obtain a p value.

#### 598 *Respiration measurements*

599 Peaks were extracted from respiration traces using the findPeaks function in Matlab with a minimum  
600 peak distance of 10 Hz.

#### 601 *Raincloud plots*

602 Raincloud plots of the type in Figure 2G were created using the Matlab version of the RainCloudPlots  
603 package (Allen, Poggiali, Whitaker, Marshall, & Kievit, 2018).

604

#### 605 **Microglia ablation with CSF1R inhibitor PLX5622**

606 CSF1R inhibitor PLX5622 was generously provided by Plexxikon (Berkeley, CA) and mixed into  
607 standard rodent diet at 1200 mg per kilogram of chow (Research Diets: AIN-76A diet). Control  
608 diet was formulated identically, but without the inhibitor.

609

#### 610 **Flow Cytometry (Figure 2--Supplement 1)**

611 Microglia ablation was confirmed via flow cytometry. A single cell suspension enriched for microglia was  
612 generated as previously described (Hammond et al., Immunity 2019). Briefly, mice were deeply  
613 anesthetized with a mixture of ketamine (100 mg/kg) and xylazine (10 mg/kg) and transcardially  
614 perfused with 20 mL of cold Hank's balanced salt solution (HBSS, GIBCO, 14175-079). Bulbs and brains  
615 were minced using a razor blade (Electron Microscopy Science, 71960) and homogenized using a dounce  
616 tissue grinder (Wheaton, 357542). Microglia were enriched via centrifugation in 40% Percoll (Sigma-  
617 Aldrich, 17-0891-01) at 500g for 1h at 4°C. Samples were incubated for 20 min with Blue Dead Cell Stain  
618 (Thermo Fisher, L34961) and Fc blocking antibody (Rat Anti-Mouse CD16/CD32, BD Bioscience, 553141)  
619 in HBSS + 2 mM EDTA. Cells were additionally stained for 20 min with antibodies against CD45  
620 (Biolegend, 103116) and CD11b (Biolegend, 101217) in FACS buffer (HBSS + 2 mM EDTA + 0.5% BSA).

621 Counting Beads (CountBright, Thermo Fisher Scientific, C36950) were added and samples analyzed using  
622 a FACS Aria II 'SORP'. All events were collected until a total of 8000 counting beads had been acquired  
623 for each sample. The data were analyzed in FlowJo 10.2.

624

### 625 **BrdU injections (Figure 2—Supplement 3)**

626 Mice received two intraperitoneal injections of BrdU (100 mg/kg in 0.9% saline) 12 hours apart.

627

### 628 **Fixed tissue preparation**

629 Mice were deeply anesthetized with a ketamine/xylazine mixture and perfused transcardially with 20 mL  
630 of PBS (pH 7.4) first, followed by 30-50 mL of 4% paraformaldehyde (diluted from 16% stock,  
631 Electron Microscopy Sciences) in 0.1 M phosphate buffered saline (pH 7.4). Brains were removed from  
632 the skull and placed in 5 ml 4% paraformaldehyde for 2 hours. They were then rinsed with PBS and one  
633 hemisphere for each mouse was sliced coronally at 100  $\mu\text{m}$  with a vibratome (Leica) for imaging of  
634 dTomato-labeled abGC spines (Figure #), while the other hemisphere was sliced sagittally at 35-40  $\mu\text{m}$  for  
635 immunostaining (Iba, Figure # or BrdU, Figure #).

636

### 637 **Immunohistochemistry**

638 For Iba-1 staining, 3-4 slices per mouse spanning the olfactory bulb were permeabilized and blocked  
639 with a solution containing 0.1% Triton X-100 (Fisher), and 5% goat serum in PBS for 1 hour at room  
640 temperature or blocked with Starting Block (ThermoFisher) with 0.3% TritonX-100 for 1 hour at room  
641 temperature and then incubated overnight at 4°C with the primary antibodies rabbit anti-Iba-1 (Wako:  
642 019- 19741, RRID:AB\_839504) at 1:500 or rabbit anti-GFAP (Dako: Z0334, RRID: AB\_10013382) at 1:1000  
643 and then secondary antibodies (Alexa goat-647 anti-Rabbit) for 2 hours at room temperature. For  
644 BrdU/NeuN staining, one of every eight slices per mouse was chosen. Slices were washed in PBS with  
645 0.1% Triton X three times for five minutes each before being incubated for in 2N HCl for 10 minutes at  
646 room temperature and then 20 minutes at 37°C. They were then placed in 0.1M Boric Acid buffer for 15  
647 min and washed again three times with PBS. All slices were then incubated in starting block  
648 (ThermoFisher) with 0.3% Triton X for one hour before being staining in in PBS with 0.3% Triton X with  
649 rat anti-BrdU (Abcam: 6326 at 1:200), and mouse anti-NeuN (Millipore: MAB377 at 1:200) primary  
650 antibodies for 36-48 hours at 4°C and then secondary antibodies (Alexa Fluor 488 and 594 at 1:200) for 2  
651 hours at room temperature. Slices were treated with 0.2% w/v Sudan Black in 70% EtOH for 5 min  
652 before mounting.

653

### 654 **Confocal imaging and quantification**

655 Slices were mounted with DAPI mounting media (Vectashield DAPI) and imaged with a confocal  
656 microscope (LSM 880, Zeiss). Reported cell densities were calculated based on distances in fixed tissue,  
657 uncorrected for volume changes due to fixation and mounting. All imaging and quantification were  
658 performed blind to the experimental group of the animal (PLX-treated or control).

#### 659 *Iba1* Quantification (Figure 2—Supplement 2)

660 For the 1- and 4-week timepoints, one z-stack per animal was imaged at 10X with pixel size 0.42 x 0.42 x  
661 1  $\mu\text{m}$  spanning the thickness of the slice. The number of frames used for maximum intensity projections  
662 was determined by the image with the smallest z-stack. For the 9-week timepoint, two z-stacks per  
663 animal were imaged at 20X and the counts from both were averaged. Stacks were imaged with pixel size  
664 0.59 x 0.59 x 1  $\mu\text{m}$  spanning 10  $\mu\text{m}$  and converted to maximum intensity projections. For timepoints, the



665 polygon tool was used to outline the granule cell layer in each image and the area was measured. Iba-1  
666 positive cells were counted in this area manually using the Cell Counter plugin on maximum intensity  
667 projection images in ImageJ. Cells were counted only if the cell body was fully included in the image  
668 stack.

#### 669 *BrdU Quantification (Figure 2—Supplement 3)*

670 For BrdU/NeuN, two z-stacks per OB (one centered dorsally and one centered ventrally) were taken at  
671 20X with pixel size 0.52 x 0.52 x 0.89  $\mu\text{m}$  spanning 9.8  $\mu\text{m}$ . BrdU counts were performed using the  
672 automatic spots function in Imaris (Bitplane) with the same quality settings for spot detection  
673 for all images (quality threshold 2370, number of voxels threshold 524). Cells were counted as positive if  
674 they were located in the granule cell layer and were also positive for NeuN. The area of the granule cell  
675 layer in each image was measured in ImageJ, and the density of BrdU/NeuN positive cells was calculated  
676 for each image and averaged for all images for each mouse.

#### 677 *Spine quantification (Figure 5)*

678 All images were 20-40  $\mu\text{m}$  z-stacks with 0.42 z-step taken with a 63x oil immersion objective, and four  
679 fields of view were imaged per mouse. Care was taken to ensure minimal saturation (less than 5% of  
680 pixels). Dendrites that were judged to be sufficiently bright, well-separated from adjacent or overlapping  
681 dendrites, at least 40  $\mu\text{m}$  long, and extending at an angle from the imaging plane less than 45 degrees  
682 were chosen for tracing in Imaris. Each dendrite and all its dendritic protrusions less than 10  $\mu\text{m}$  in  
683 length were manually traced using the Filaments function. Data from each dendrite were exported in a  
684 text file and imported into Matlab for plotting. For spine density, the Imaris property “Filament No.  
685 Spine Terminal Pts” was used (meaning that branched spines were counted by the number of spine  
686 heads rather than attachment points). For spine head volume, the Imaris property “HeadVolume” was  
687 used. Imaris defines the spine head to be the terminal 25% of the spine’s length and calculates the  
688 volume in this compartment.

689

#### 690 **Electrophysiology (Figures 6 and 7)**

691 Mice were deeply anesthetized with a mixture of ketamine (100 mg/kg) and xylazine (10 mg/kg) and  
692 perfused with ice-cold modified ACSF solution (in mM: 120 choline chloride, 25 glucose, 25 NaHCO<sub>3</sub>, 2.5  
693 KCl, 0.5 CaCl<sub>2</sub>, 7 MgSO<sub>4</sub>, 11.6 ascorbic acid, 3.1 pyruvic acid, 1.25 NaH<sub>2</sub>PO<sub>4</sub>). Brains were removed and  
694 placed in the same ice-cold modified ACSF. Horizontal slices (300  $\mu\text{m}$  thick) of olfactory bulbs were cut  
695 using a vibratome (VT1000S; Leica, Germany). Slices were incubated in oxygenated holding solution (in  
696 mM: 119 NaCl, 26.2 NaHCO<sub>3</sub>, 1 NaH<sub>2</sub>PO<sub>4</sub>\*H<sub>2</sub>O, 2.5 KCl, 22 glucose, 1.3 CaCl<sub>2</sub>, 2.5 MgSO<sub>4</sub>) at 33°C for at  
697 least 30 minutes before being transferred to oxygenated ACSF (in mM: 119 NaCl, 26.2 NaHCO<sub>3</sub>, 1  
698 NaH<sub>2</sub>PO<sub>4</sub>\*H<sub>2</sub>O, 2.5 KCl, 22 glucose, 2.5 CaCl<sub>2</sub>, 1.3 MgSO<sub>4</sub>). Extra slices were maintained in holding  
699 solution at room temperature. Whole-cell recordings (Bessel filtered at 1.8 kHz and acquired at 10 kHz)  
700 were performed using patch pipettes filled with internal solution (in mM: 125 potassium gluconate, 10  
701 HEPES, 1 EGTA, 2.0 Na<sub>2</sub>-ATP, 0.5 Na<sub>3</sub>-GTP, 0.025 CaCl<sub>2</sub>, 2 MgCl<sub>2</sub>, pH 7.3) using a Multiclamp 700B  
702 amplifier (Molecular Devices, Palo Alto, CA) at 36 °C. Cells were visualized with dTomato and DIC with  
703 custom-built optics on a BX51WI microscope (Olympus Optical, Tokyo, Japan) and recorded with pClamp  
704 10.3 (Molecular Devices). Cell identity was confirmed by the presence of fluorescence material in the  
705 patch pipet after membrane rupture and/or cell fill with Alexa Fluor 488, and only cells that had a  
706 proximal dendrite that extended from the soma in the direction of the EPL while remaining beneath the  
707 surface of the slice (i.e. cells that had dendrites that did not appear to have been cut during slicing) were  
708 targeted for patching. Patch pipets had 8-11 M $\Omega$  open tip resistance. Series resistance was not

709 compensated. Cells were recorded in continuous 10-second sweeps for five minutes with a test pulse at  
710 the beginning of every sweep, which was used to calculate series resistance and holding current in  
711 Matlab for initial quality control. sEPSCs were recorded at -70 mV and sIPSCs were recorded at 0 mV. We  
712 waited at least one minute after breaking into the cell before beginning recording for sEPSCs and at least  
713 30 seconds after switching the holding potential for sIPSCs; sEPSCs were always recorded first. Cells  
714 were recorded within 8 hours of slicing, and there did not appear to be any relationship between the  
715 time of recording and the frequency of synaptic events (data not shown). Experimenters were not blind  
716 to experimental group during recording.

#### 717 *Analysis*

718 Experimenters were blind to experimental group during analysis. Cells with an initial series resistance of  
719 <50 M $\Omega$  were used for analysis. Sweeps that deviated from the average series resistance across the first  
720 three sweeps by more than 25% or had a holding current of more than 100 pA at -70 mV were excluded.  
721 The cell was excluded entirely if less than half of the recording sweeps remained after quality control.  
722 For each cell, separate test pulses (-10 mV, 20 ms) with 50 repetitions at 20 kHz were recorded before  
723 and after each set of recordings, and these files were used to calculate series resistance (based on the  
724 maximum current recorded at the beginning of the pulse), membrane resistance (based on the steady  
725 state current during the last 20% of the pulse), and cell capacitance (based on the time constant of an  
726 exponential fit between 20% and 80% of the current decay). Reported values in Figures 6 and 7  
727 supplements are the means of these parameters from before and after the 5 minutes of sEPSC  
728 recordings. For sEPSCs and sIPSCs, all sweeps were concatenated for each cell (excluding 0.5 s around  
729 the test pulse), filtered with a 60Hz band-stop filter with five harmonics in Matlab, and exported into  
730 Mini Analysis v. 6.0.7 (Synaptosoft). sEPSCs were detected with the following parameters: threshold 5,  
731 period to search a local minimum 10000, time before a peak to baseline 15000, period to search a decay  
732 time 20000, fraction of peak to find a decay time 0.37, period to average a baseline 1000, area threshold  
733 20, number of points to average for peak 1, direction of peak "negative." After the initial detection step,  
734 "Scan and detect double peaks" was selected. sIPSCs were detected with the following parameters:  
735 threshold 8, period to search a local minimum 10000, time before a peak to baseline 6000, period to  
736 search a decay time 20000, fraction of peak to find a decay time 0.37, period to average a baseline 1000,  
737 area threshold 80, number of points to average for peak 1, direction of peak "positive." In both cases,  
738 the detection was manually inspected, and the timepoints spanning any sections of the trace that  
739 exhibited increased noise (typically due to fluctuations in seal quality that caused many obviously false  
740 positive events) were noted. Event data was exported to a text file and imported into Matlab and noisy  
741 sections were excluded before further analysis. Cells that had many noisy sections were excluded. This  
742 included 3 control cells and 2 PLX cells for EPSCs and 2 control cells and 4 PLX cells for IPSCs (Figure 6) as  
743 well as 3 control and 3 PLX cells for EPSCs and 8 control cells and 9 PLX cells for IPSCs (Figure 7).



744 **Table 1**

|    |                   |
|----|-------------------|
| 1  | ethyl tiglate     |
| 2  | ethyl valerate    |
| 3  | Valeric acid      |
| 4  | allyl butyrate    |
| 5  | (-) carvone       |
| 6  | 2-methoxypyrazine |
| 7  | isoeugenol        |
| 8  | allyl tiglate     |
| 9  | valeraldehyde     |
| 10 | isoamyl acetate   |
| 11 | anisole           |
| 12 | ethyl propionate  |
| 13 | propyl acetate    |
| 14 | 2-heptanone       |
| 15 | acetophenone      |

745

746 **Methods references**

- 747 Allen, M., Poggiali, D., Whitaker, K., Marshall, T. R., & Kievit, R. (2018). Raincloud plots: a multi-platform  
748 tool for robust data visualization. *PeerJ Preprints*, 6, e27137v1. [https://doi.org/10.1044/1092-](https://doi.org/10.1044/1092-4388(2010/09-0205))  
749 4388(2010/09-0205)
- 750 Arganda-Carreras, I., Kaynig, V., Rueden, C., Eliceiri, K. W., Schindelin, J., Cardona, A., & Seung, H. S.  
751 (2017). Trainable Weka Segmentation: A machine learning tool for microscopy pixel classification.  
752 *Bioinformatics*, 33(15), 2424–2426. <https://doi.org/10.1093/bioinformatics/btx180>
- 753 Dombeck, D., & Tank, D. (2014). Two-photon imaging of neural activity in awake mobile mice. *Cold*  
754 *Spring Harbor Protocols*, 2014(7), 726–736. <https://doi.org/10.1101/pdb.top081810>
- 755 Dubbs, A., Guevara, J., & Yuste, R. (2016). moco: Fast Motion Correction for Calcium Imaging. *Frontiers*  
756 *in Neuroinformatics*, 10(February), 1–7. <https://doi.org/10.3389/fninf.2016.00006>
- 757 Grimaud, J., & Murthy, V. N. (2018). How to monitor breathing in laboratory rodents: a review of the  
758 current methods. *Journal of Neurophysiology*, 120(2), 624–632.  
759 <https://doi.org/10.1152/jn.00708.2017>
- 760 Guo, Z. V., Hires, S. A., Li, N., O'Connor, D. H., Komiyama, T., Ophir, E., ... Svoboda, K. (2014). Procedures  
761 for behavioral experiments in head-fixed mice. *PLoS ONE*, 9(2).  
762 <https://doi.org/10.1371/journal.pone.0088678>
- 763 Hioki, H., Kuramoto, E., Konno, M., Kameda, H., Takahashi, Y., Nakano, T., ... Kaneko, T. (2009). High-level  
764 transgene expression in neurons by lentivirus with Tet-Off system. *Neuroscience Research*, 63(2),  
765 149–154. <https://doi.org/10.1016/j.neures.2008.10.010>
- 766 Jung, S., Aliberti, J., Graemmel, P., Sunshine, M. J., Kreutzberg, G. W., Sher, A., & Littman, D. A. N. R.  
767 (2000). Analysis of Fractalkine Receptor CX 3 CR1 Function by Targeted Deletion and Green  
768 Fluorescent Protein Reporter Gene Insertion, 20(11), 4106–4114.
- 769 Wallace, J. L., Wienisch, M., & Murthy, V. N. (2017). Development and Refinement of Functional  
770 Properties of Adult-Born Neurons. *Neuron*, 96, 883–896.  
771 <https://doi.org/10.1016/j.neuron.2017.09.039>
- 772 Wienisch, M., & Murthy, V. N. (2016). Population imaging at subcellular resolution supports specific and  
773 local inhibition by granule cells in the olfactory bulb. *Scientific Reports*, 6(April), 29308.  
774 <https://doi.org/10.1038/srep29308>
- 775 Willmore, B., & Tolhurst, D. J. (2001). Characterizing the sparseness of neural codes. *Network*, 12(3),  
776 255–270. <https://doi.org/10.1088/0954-898X/12/3/302>

777

778

779

780

Figure 1

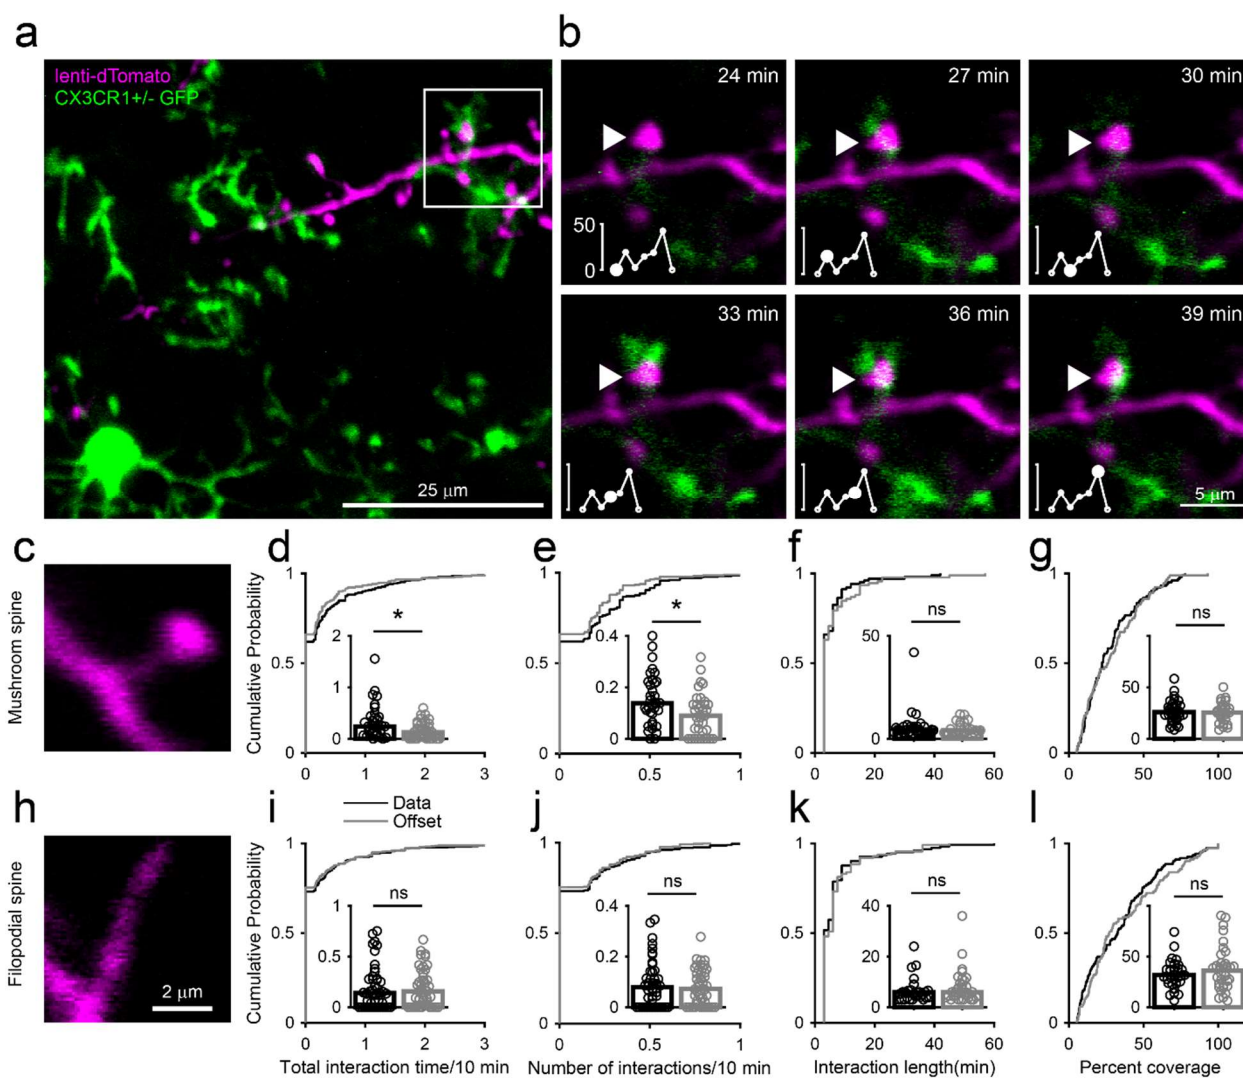

Figure 1: Microglia preferentially interact with mushroom spines on developing abGCs

- a) Maximum intensity projection (10  $\mu\text{m}$  volume at the first imaging timepoint) showing dTomato-labeled abGCs in a CX3CR1-GFP heterozygous mouse imaged 4 weeks after lentivirus injection. Brightness and contrast adjusted for display only.
- b) Single plane time series showing the region marked in (A). Inset shows the calculated percent microglial coverage for the spine marked with the arrowhead (images shown for 6 frames, 7<sup>th</sup> frame not shown but the value is plotted, showing the end of the interaction) with the larger circle marking the value for the corresponding frame. Brightness and contrast adjusted with the same parameters for each timepoint for display only.
- c) Single plane image showing an example of a spine classified as a mushroom spine because the spine head is wider and brighter than the spine neck.
- d) Cumulative distribution showing total interaction time (normalized to 10 minutes) for all mushroom spines in the real data ("Data") compared to values calculated from translating the microglial channel relative to the dendritic imaging channel ("Offset"). Inset, the median total interaction time across all dendrites, each marked with a circle (value for each dendrite is the median time across all mushroom spines) was significantly higher in the real data (Wilcoxon rank sum test,  $z = 2.34$ ,  $p = 0.020$ ).
- e) Cumulative distribution showing the number of interactions (normalized to 10 minutes) for all mushroom spines. Inset, the median number of interactions across all dendrites (value for each dendrite is the median number across all mushroom spines) was significantly higher in the real data (Wilcoxon rank sum test,  $z = 2.45$ ,  $p = 0.014$ ).
- f) Cumulative distribution showing interaction length (for spines that had at least one frame that met the criteria for an interaction, see Methods). Inset, the median interaction length across all dendrites (value for each dendrite is the median interaction length across all interactions for all mushroom spines) was not different between real and offset data (Wilcoxon rank sum test,  $z = 0.25$ ,  $p = 0.80$ ).
- g) Cumulative distribution showing maximum percent coverage (median across all interactions for a given spine for spines that had at least one frame that met the criteria for an interaction). Inset, the median maximum percent coverage across all dendrites (value for each dendrite is the median interaction length across all interactions for all mushroom spines) was not different between real and offset data (Wilcoxon rank sum test,  $z = 0.092$ ,  $p = 0.93$ ).
- h) Single plane image of a spine classified as a filopodial spine because it has no clear spine head.
- i) Cumulative distribution showing total interaction time (normalized to 10 minutes) for all filopodial spines in the real data ("Data") compared to values calculated from translating the microglial channel relative to the dendritic imaging channel ("Offset"). Inset, the median total interaction time across all dendrites, each marked with a circle (value for each dendrite is the median time across all filopodial spines) was not different between real and shuffled data (Wilcoxon rank sum test,  $z = -0.29$ ,  $p = 0.77$ ).
- j) Cumulative distribution showing the number of interactions (normalized to 10 minutes) for all filopodial spines. Inset, the median number of interactions across all dendrites (value for each dendrite is the median number across all filopodial spines) was not different between real and offset data (Wilcoxon rank sum test,  $z = 0.0084$ ,  $p = 0.99$ ).
- k) Cumulative distribution showing interaction length (for spines that had at least one frame that met the criteria for an interaction, see Methods). Inset, the median interaction length across all

dendrites (value for each dendrite is the median interaction length across all interactions for all filopodial spines) was not different between real and offset data (Wilcoxon rank sum test,  $z = -0.50$ ,  $p = 0.62$ ).

- l) Cumulative distribution showing maximum percent coverage (median across all interactions for a given spine for spines that had at least one frame that met the criteria for an interaction). Inset, the median maximum percent coverage across all dendrites (value for each dendrite is the median interaction length across all interactions for all filopodial spines) was not different between real and offset data (Wilcoxon rank sum test,  $z = -0.72$ ,  $p = 0.47$ ).

Bars represent medians across individual dendrites (circles).

$n = 726$  spines (271 mushroom spines and 455 filopodial spines) from 48 dendrites combined at 1, 2, 3, and 4 weeks post injection in 3 mice

\* $p < 0.05$

## Figure 2

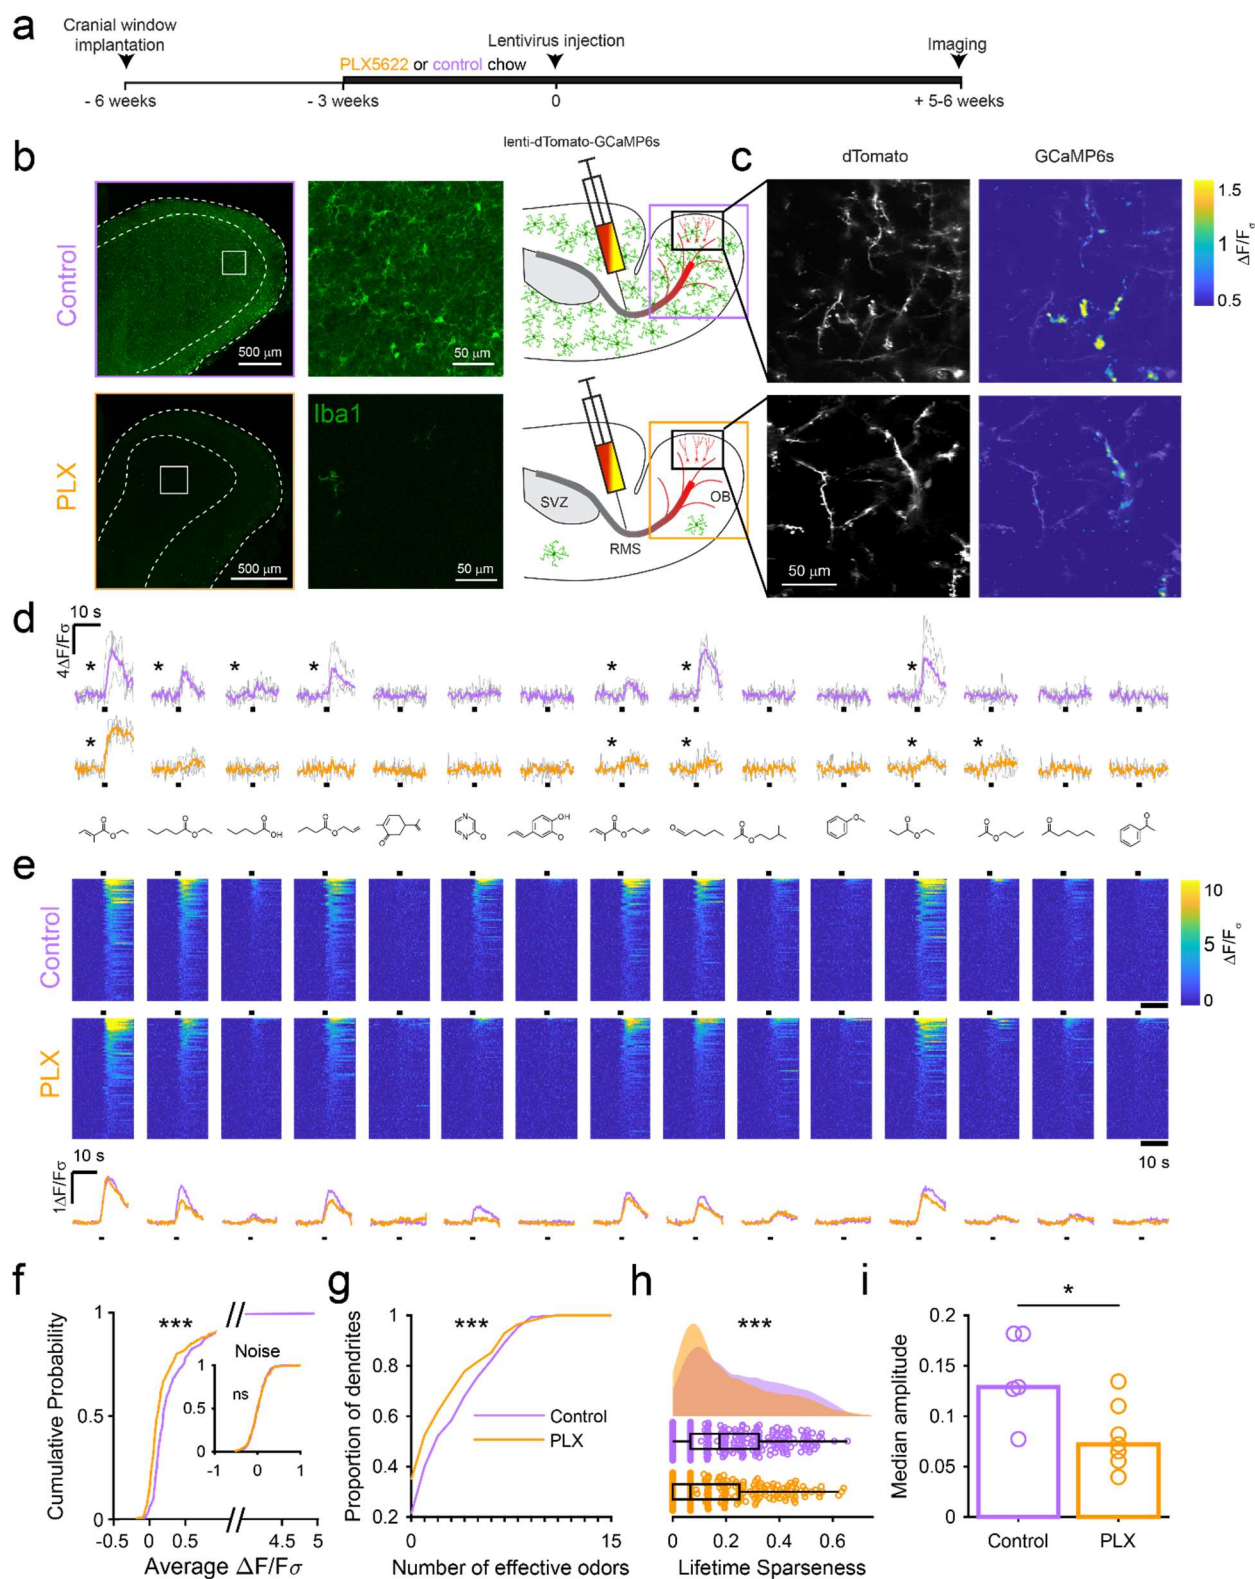



Figure 2: Microglia ablation during development reduces odor-evoked responses of abGCs in anesthetized mice.

- a) Experimental timeline for microglia ablation during development of abGCs. A cranial window was implanted and 3 weeks later mice were given control or PLX5622-containing chow for the remainder of the experiment. After 3 weeks of chow consumption, a lentivirus was injected into the RMS to label abGCs, which were imaged 5-6 weeks later.
- b) Left, images of Iba1 staining in the olfactory bulb of control (top) and PLX-treated (bottom) mice. White squares show the locations of the enlarged insets. Dotted lines mark the upper edge of the glomerular and granule cell layers. Right, schematic showing injection of a lentivirus encoding dTomato and GCaMP6s and microglia ablation.
- c) Example fields of view showing an average intensity projection of dTomato structural images of abGC dendrites (left) and overlaid heatmaps of GCaMP6s-recorded activity (right) in response to ethyl valerate in control (top) and PLX5622-treated (bottom) mice.
- d) GCaMP6s traces showing odor responses of example ROIs from control (top) and PLX-treated (bottom) mice (chosen to have the same ranked response to the first odor). Gray traces represent responses on individual trials and colored trace is the mean across trials. Individual trial traces were median filtered over three frames before averaging for presentation. \*, odor responses for which the mean response was above threshold
- e) Heatmap traces from the 100 ROIs with the largest odor-evoked Ca<sup>2+</sup> signals across all mice ranked separately for each of 16 odors (molecular structures shown above). Black bar denotes odor time. Bottom, mean response time course for each odor across all ROIs.
- f) Cumulative distribution showing that the distribution of responses (averaged across odors for each dendrite) is shifted to the left in PLX-treated mice (Two sample Kolmogorov–Smirnov test for probability distributions,  $D = 0.25$ ,  $p = 2.56e-08$ ) while the noise distributions constructed from blank trials are not different ( $D = 0.042$ ,  $p = 0.96$ ).
- g) Cumulative distribution showing the number of effective odors (odors that evoked responses above the ROC threshold 0.39, which was calculated across all dendrites from both groups). The median number of effective odors was significantly lower in the PLX-treated group (Wilcoxon rank sum test,  $z = 3.49$ ,  $p = 4.86e-04$ ).
- h) Raincloud plot showing the distribution of lifetime sparseness across all dendrites. Above, kernel density estimate. Below, boxplot showing the median, interquartile range (box), and 1.5 times the interquartile range (whiskers) superimposed on a dot plot of all the data (one dot per dendrite). Median lifetime sparseness was significantly lower in the PLX-treated group (Wilcoxon rank sum test,  $z = 5.53$ ,  $p = 4.18e-04$ ).
- i) Plot showing the median response amplitude across all dendrites from each mouse; bars represent the group median and dots represent each mouse. Response amplitude was lower in PLX-treated mice (Wilcoxon rank sum test, rank sum = 45,  $p = 0.048$ ).

n = 287 dendrites from 5 control mice and 277 dendrites from 7 PLX-treated mice

\* $p < 0.05$ , \*\* $p < 0.01$ , \*\*\* $p < 0.001$



## Figure 2.1

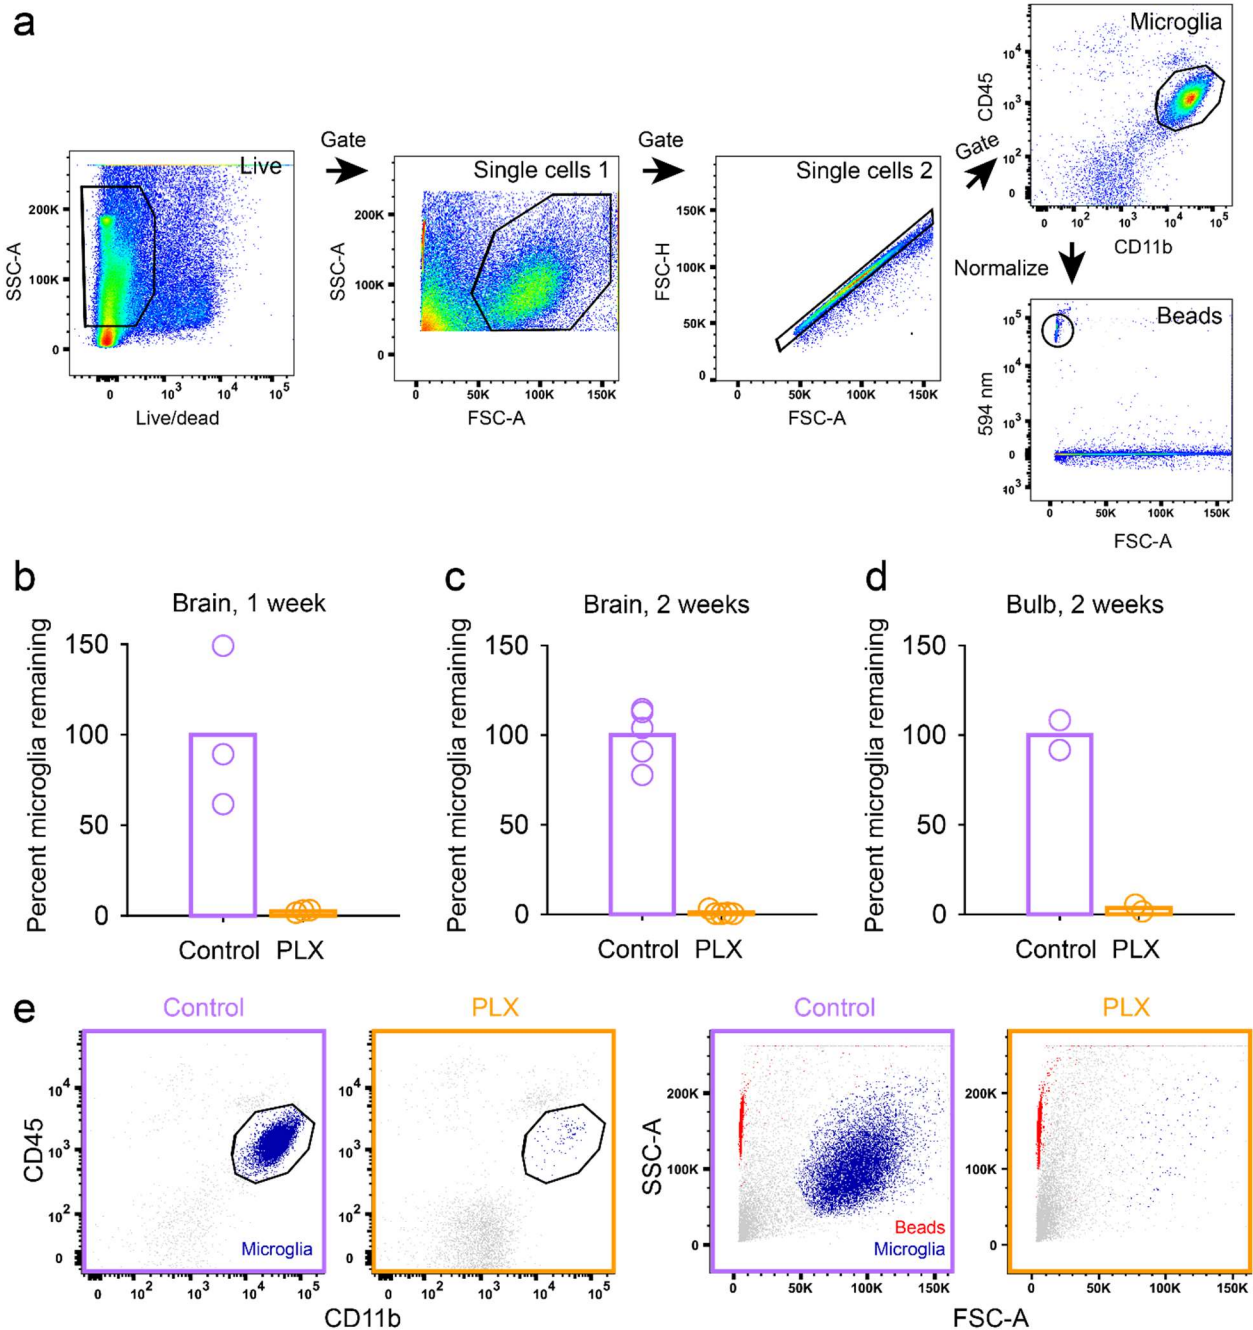

Figure 2 Supplement 1

- Microglia cells were gated on  $CD45^{\text{intermediate}}$  and  $CD11b^{\text{high}}$  using the following gating strategy: Debris and dead cells were excluded based on the fluorescent intensity of a dead cell stain. Next, single cells were determined based on their light scattering properties (first by side over forward scatter, SSC-A/FSC-A, and second by forward scatter height over area, FSC-H/FSC-A). The counting beads were identified based on their fluorescent emission at 594 nm.
- Plot showing the percent of live microglia remaining (normalized to the mean of the controls) in mice treated with PLX compared to controls (number of microglia in each sample normalized to

counting beads) in whole brain samples after 1 week of control or PLX diet demonstrating 97.4% ablation.

- c) Plot showing the percent of live microglia remaining in mice treated with PLX (normalized to the mean of the controls) compared to controls (number of microglia in each sample normalized to counting beads) in whole brain samples after 1 week of control or PLX diet, demonstrating 99.0% ablation.
- d) Plot showing the percent of live microglia remaining in mice treated with PLX (normalized to the mean of the controls) compared to controls measured via FACs olfactory bulb samples after 2 weeks of control or PLX diet, demonstrating 96.4% ablation.
- e) Interrogation of light scattering properties (SSC-A/FSC-A) independent of surface marker labeling revealed that hardly any cells remained in the microglia enriched samples after treatment with PLX compared to control samples. This becomes visually more apparent when microglia cells (CD45<sup>intermediate</sup>, CD11b<sup>high</sup>, control and PLX-treated plots on left) are backpropagated to SSC-A/FSC-A plots on right (in dark blue). Note that counting beads can be observed in red.

Bars represent the mean across mice (circles).

Whole brain: n = 5 control and 5 PLX mice

OB: n = 2 control and 2 PLX samples (each sample contained both OBs from 2 littermates which were combined after dissection)

## Figure 2.2

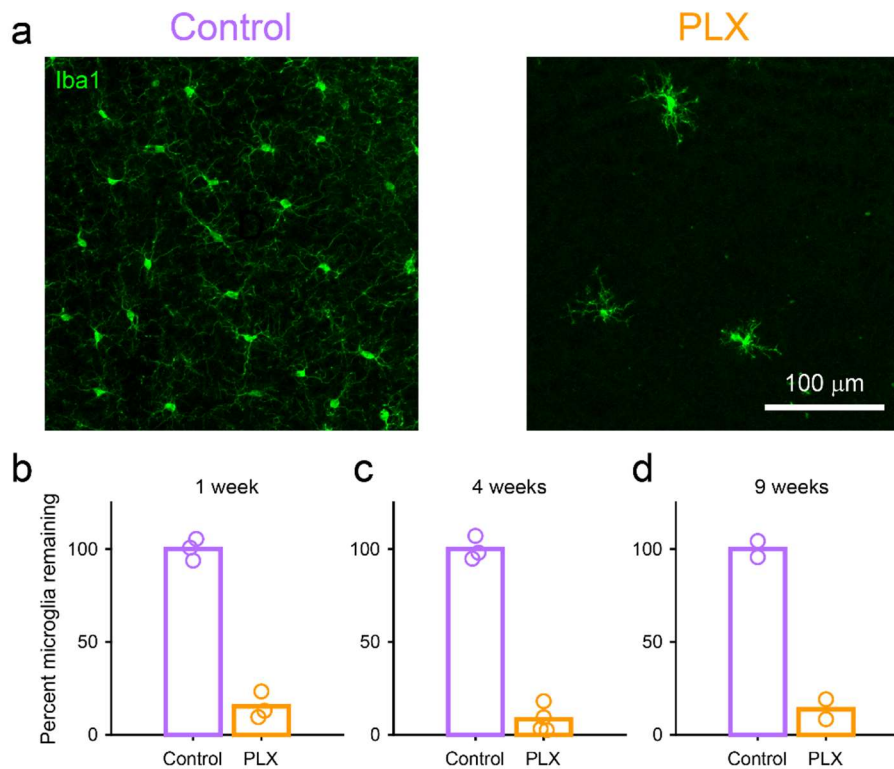

### Figure 2 Supplement 2

- Maximum intensity projection showing microglia stained with Iba1 in the granule cell layer of the olfactory bulb in control (left) and PLX-treated (right) mice after 4 weeks of treatment.
- Plot showing the percent of microglia remaining in mice treated with PLX compared to control littermates based on counting of cell bodies stained with Iba1 after 1 week of treatment, demonstrating 84.7% ablation.
- Percent microglia remaining after 4 weeks of treatment (same mice used for spine quantification in Figure 5), demonstrating 91.7% ablation.
- Percent microglia remaining after 9 weeks of treatment (PLX mice are the same mice used for imaging at the 9 weeks timepoint in Figure 4 Supplement 1 and control mice are age-matched controls), demonstrating 86.2% ablation.

Bars represent the mean across mice (circles).

n = 3 mice (1 week), 4 mice (4 weeks), and 2 mice (9 weeks)

## Figure 2.3

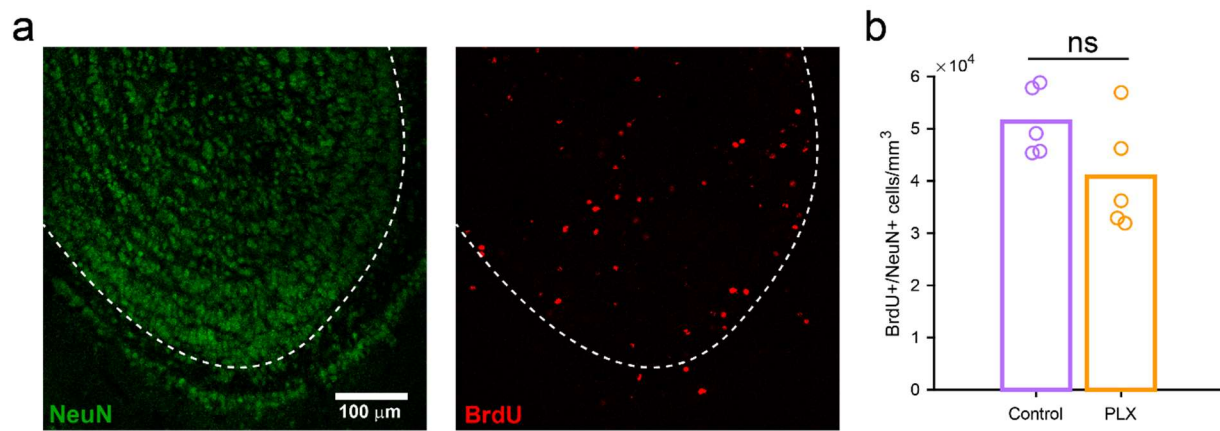

Figure 2 Supplement 3

- Maximum intensity projection showing NeuN staining (left) and BrdU staining (right) in the olfactory bulb. Dotted line indicates boundary of the granule cell layer, where positive cells were quantified.
- Plot showing the density of BrdU+/NeuN+ cells per mm<sup>3</sup> in the granule cell layer of the olfactory bulb in control mice and mice treated with PLX for 4 weeks, beginning 3 days after BrdU injection. The density was not different between groups (Two sample t-test,  $t = 1.89$ ,  $p = 0.30$ ).

Bars represent the mean across mice (circles).

$n = 5$  control and 5 PLX-treated mice

## Figure 2.4

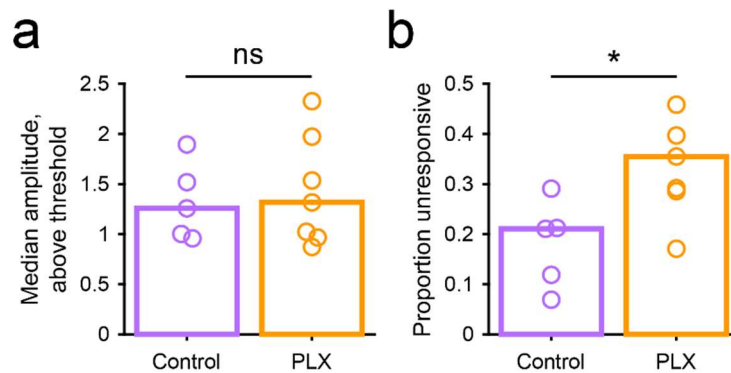

a) The median response amplitude for all responses above threshold from each mouse was not different between PLX-treated and control mice (Wilcoxon rank sum test, rank sum = 30,  $p = 0.76$ ).

b) The proportion of dendrites not responding to any of the odors in the panel was higher in PLX-treated mice (Wilcoxon rank sum test, rank sum = 19,  $p = 0.030$ ).

Bars represent the median across individual mice (circles).

$n = 5$  control mice and 7 PLX-treated mice

\* $p < 0.05$

## Figure 3

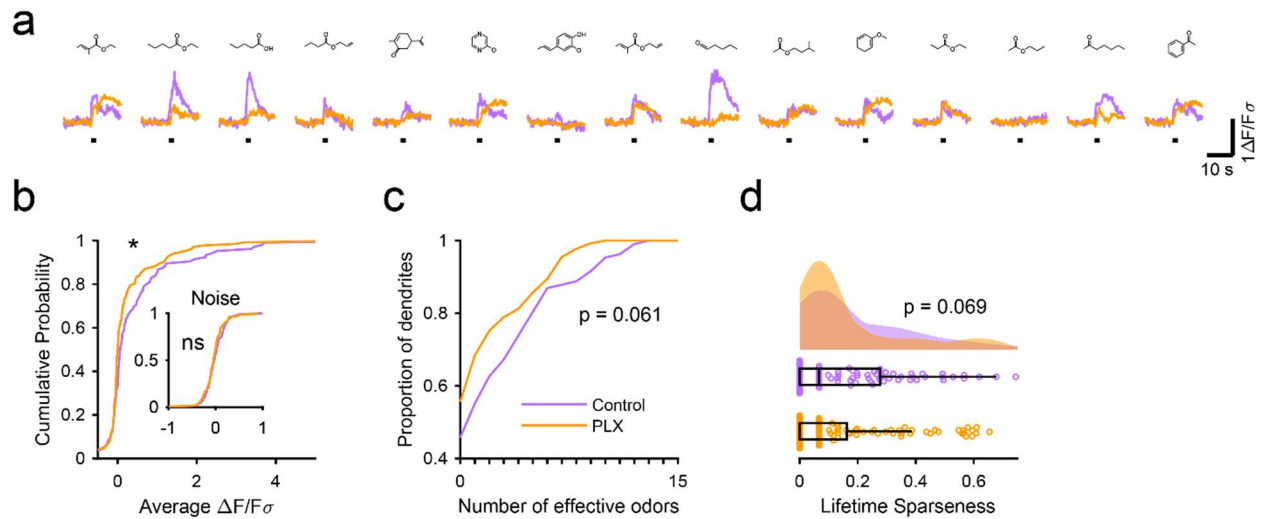

Figure 3: Microglia ablation during development reduces odor-evoked responses of abGCs in awake mice.

- Mean response time course for each odor across all ROIs. Black bar denotes odor time.
- Cumulative distribution showing that the distribution of responses (averaged across odors for each dendrite) is shifted to the left in PLX-treated mice (Two sample Kolmogorov–Smirnov test for probability distributions,  $D = 0.18$ ,  $p = 0.037$ ) while the noise distributions constructed from blank trials are not different ( $D = 0.11$ ,  $p = 0.45$ ).
- Cumulative distribution showing the number of effective odors (odors that evoked responses above the ROC threshold 0.52, which was calculated across all dendrites from both groups). There was a trend toward a lower median number of effective odors in the PLX-treated group (Wilcoxon rank sum test,  $z = 1.88$ ,  $p = 0.061$ ).
- Raincloud plot showing the distribution of lifetime sparseness across all dendrite. Above, kernel density estimate. Below, boxplot showing the median, interquartile range (box), and 1.5 times the interquartile range (whiskers) superimposed on a dot plot of all the data (one dot per dendrite). There was a trend toward lower median lifetime sparseness in the PLX-treated group (Wilcoxon rank sum test,  $z = 1.82$ ,  $p = 0.069$ ).

$n = 105$  dendrites from 3 control mice and 132 dendrites from 4 PLX-treated mice

\* $p < 0.05$

## Figure 3.1

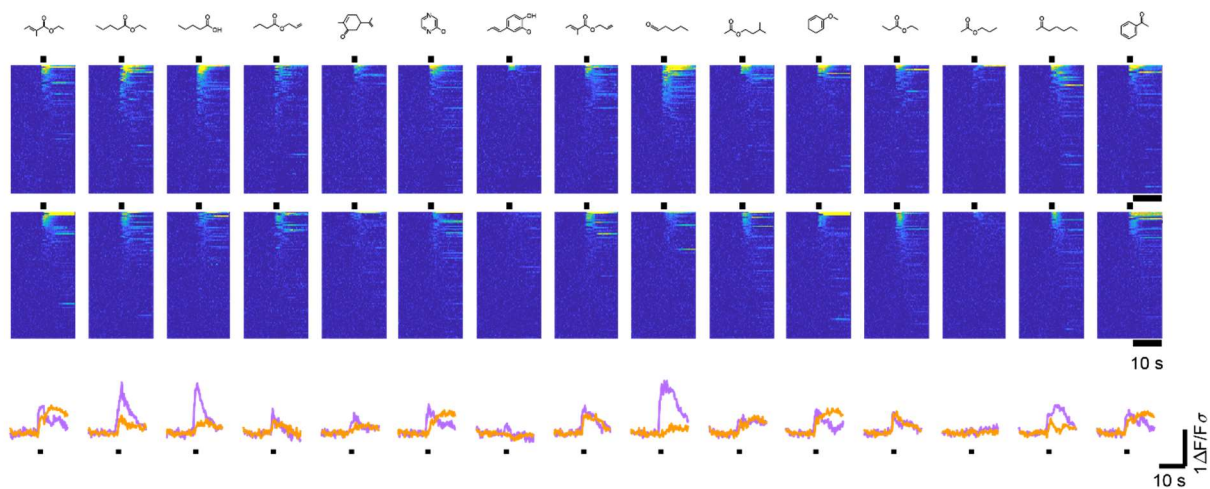

### Figure 3 Supplement 1

Heatmap traces from the 100 ROIs with the largest odor-evoked  $\text{Ca}^{2+}$  signals across all mice ranked for each of 16 odors (molecular structures shown above). Black bar denotes odor time. Mean traces shown below are the same as those from Figure 3.



## Figure 3.2

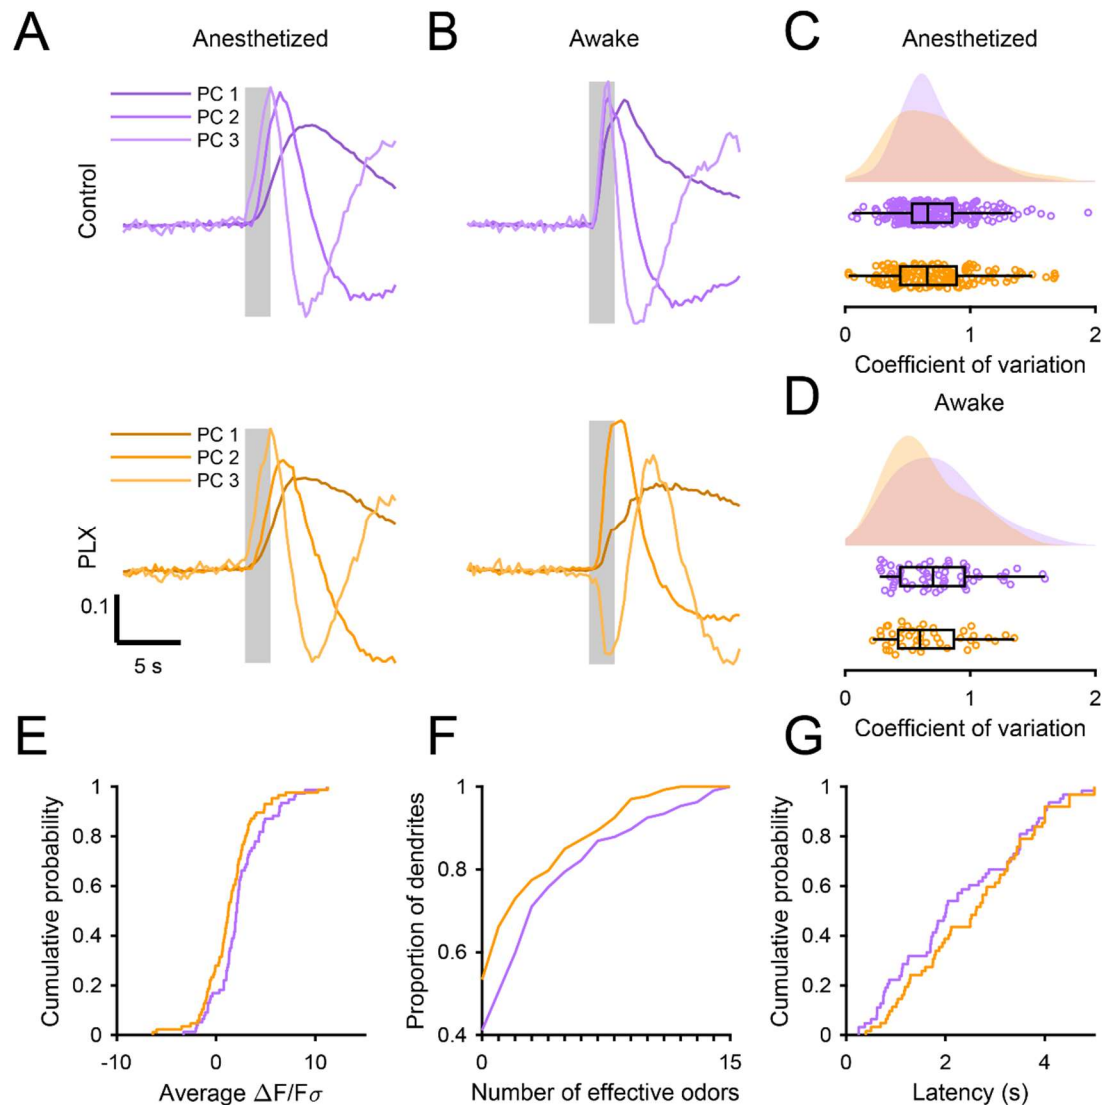

Figure 3 Supplement 2

- a) Top, the first three principal components (PCs) obtained from PCA of the temporal profiles of responses of all abGC dendrites ( $\Delta F/F\sigma$  traces, GCaMP6s) in anesthetized control mice to all odors. Percent variance explained: 36.3%, 4.19%, 1.85% for the first three PCs, respectively. Bottom, The first three PCs for odor responses in anesthetized PLX-treated mice. Percent variance explained: 33.7%, 3.82%, 1.96%. Shading indicates the odor presentation period (2 s). The timecourses of responses for the odor analysis period (5 s after odor onset) for the first three PCs was not different between control and PLX-treated mice ( $p = 0.41$ ).
- b) Top, the first three PCs for odor responses in awake control mice. Percent variance explained: 43.7%, 12.6%, 3.36%. Bottom, the first three PCs for odor responses in awake PLX-treated mice. Percent variance explained: 44.9%, 10.2%, 2.86%. The timecourses of responses for the odor

analysis period for the first three PCs were significantly different between control and PLX-treated mice ( $p = 0.011$ ).

- c) Raincloud plot showing the distribution of coefficient of variation values for all dendrites in anesthetized mice averaged across all odors for which the dendrite had a mean response above threshold (ROC thresholds calculated separately for control (threshold = 0.37) and PLX (threshold = 0.5) to ensure the same proportion of true responses). Above, kernel density estimate. Below, boxplot showing the median, interquartile range (box), and 1.5 times the interquartile range (whiskers) superimposed on a dot plot of all the data (one dot per cell, unless the cell had no responses above threshold in which case it is not included). The median CVs were not significantly different (Control: 0.59, PLX: 0.62, Wilcoxon rank sum test,  $z = 0.58$ ,  $p = 0.56$ ).
- d) Raincloud plot showing the distribution of coefficient of variation values for all dendrites in awake mice averaged across all odors for which the dendrite had a response above threshold (ROC thresholds calculated separately for control (threshold = 0.46) and PLX (threshold = 0.85) to ensure the same proportion of true responses). The median CVs were not significantly different (Control: 0.55, PLX: 0.48, Wilcoxon rank sum test,  $z = 1.47$ ,  $p = 0.14$ ).
- e) Cumulative distribution (responses averaged across odors for each dendrite) showing that the distribution of responses detected with event analysis (ROC threshold calculated across both groups combined, event detected during the odor analysis period if 6 or more frames were at least 2.6 standard deviations above baseline) is not significantly different in PLX-treated mice (Two sample Kolmogorov–Smirnov test for probability distributions,  $D = 0.18$ ,  $p = 0.23$ ).
- f) Cumulative distribution showing the number of effective odors (odors for which an event was detected in at least one repetition). The median number of effective odors was lower in the PLX-treated group (Wilcoxon rank sum test,  $z = 2.09$ ,  $p = 0.037$ ).
- g) Cumulative distribution showing that the latency from odor onset to event detection (averaged across odors for each dendrite) is not significantly different in PLX-treated mice (Two sample Kolmogorov–Smirnov test for probability distributions,  $D = 0.17$ ,  $p = 0.31$ ).

\* $p < 0.05$

### Figure 3.3

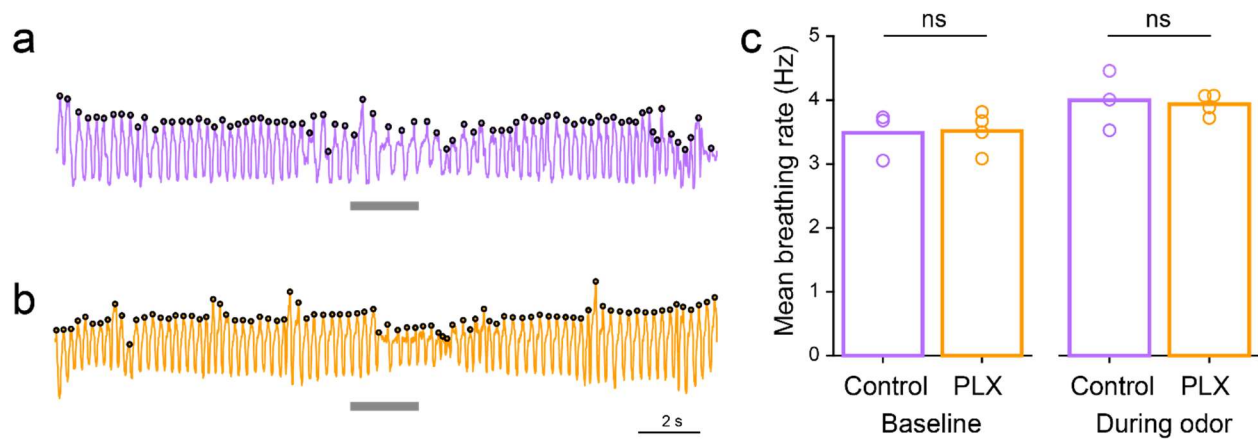

Figure 3 Supplement 3

- Example trace showing breathing recordings during one trial from a control mouse. The gray bar indicates the time the odor is on and the black circles indicate sniffs that were detected.
- Example trace showing breathing recordings during one trial from a PLX-treated mouse.
- Mean breathing rate during baseline periods (10 s before the odor comes on) and during the odor period (2 s) calculated from all sniffs recorded in all trials from each mouse. The breathing rates in the two groups were not different during the baseline period (Two sample t test,  $t = -0.11$ ,  $p = 0.91$ ) or the odor period (Two sample t test,  $t = 0.25$ ,  $p = 0.81$ ).

Bars represent the mean across mice (circles).

$n = 3$  control mice (Baseline: 15,086 detected sniffs, Odor: 2,895 detected sniffs) and 4 PLX-treated mice (Baseline: 19,248 detected sniffs, Odor: 3,468 detected sniffs)

## Figure 4

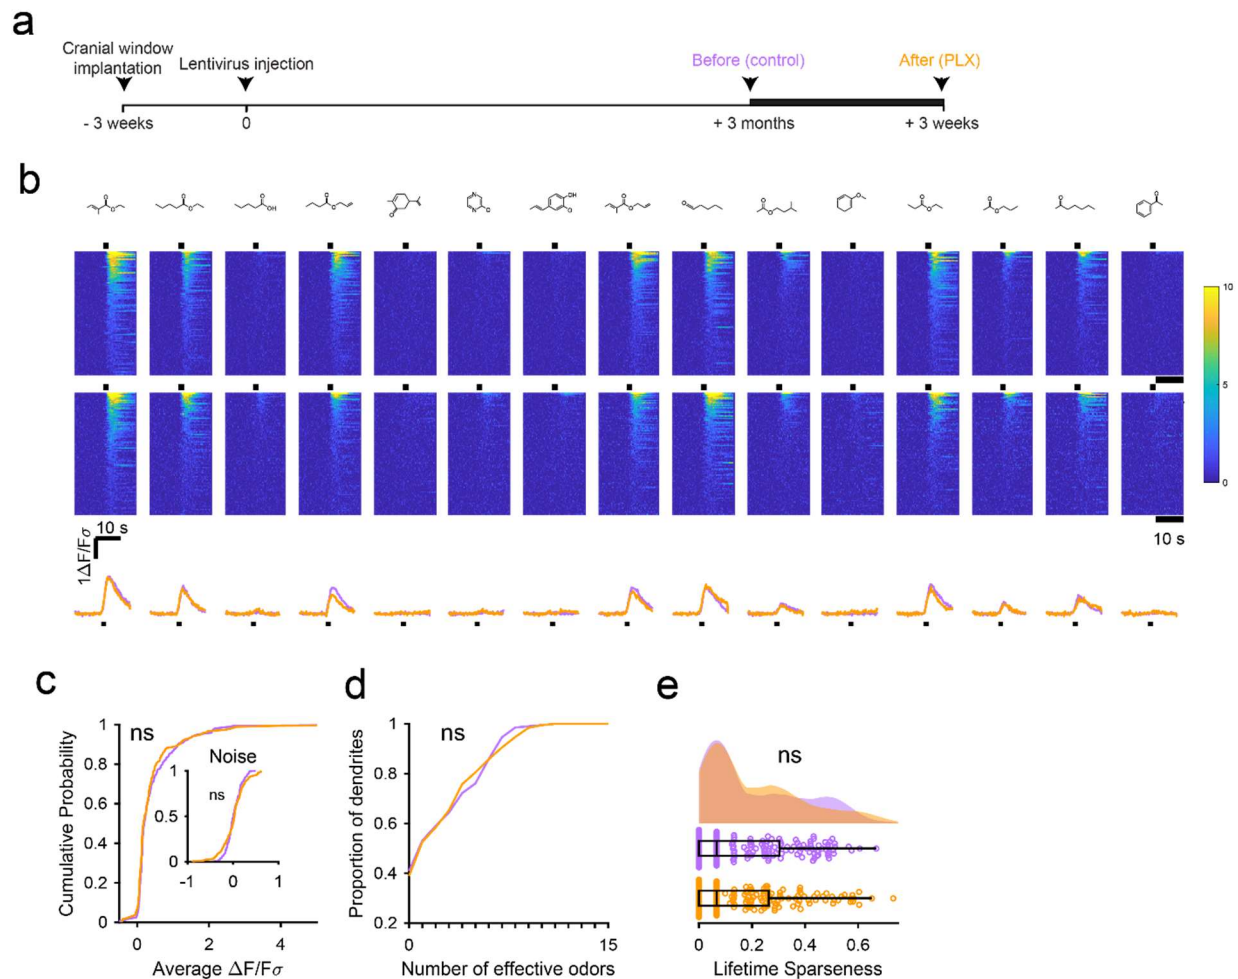

Figure 4: Microglia ablation after development has no effect on odor-evoked responses of abGCs

- Experimental timeline for microglia ablation after development of abGCs. AbGCs were labeled via lentivirus injection and allowed to mature for 3 months. A control imaging session was performed immediately before administration of PLX chow and the second imaging session occurred 3 weeks later.
- Heatmap traces from the 100 ROIs with the largest odor-evoked  $\text{Ca}^{2+}$  signals across all mice ranked for each of 16 odors (molecular structures shown above). Black bar denotes odor time. Bottom, mean response time course for each odor across all ROIs.
- Cumulative distribution showing that the distribution of responses (averaged across odors for each dendrite) is not different before and after PLX diet administration (Two sample Kolmogorov–Smirnov test,  $D = 0.087$ ,  $p = 0.89$ ) and the noise distributions constructed from blank trials are also not different ( $D = 0.11$ ,  $p = 0.15$ ).
- Cumulative distribution showing the number of effective odors (odors that evoked responses above the ROC threshold 0.53, which was calculated across all dendrites from both groups). The median number of effective odors was not different between groups (Wilcoxon rank sum test,  $z = -0.14$ ,  $p = 0.89$ ).

- e) Raincloud plot showing the distribution of lifetime sparseness across all dendrite. Above, kernel density estimate. Below, boxplot showing the median, interquartile range (box), and 1.5 times the interquartile range (whiskers) superimposed on a dot plot of all the data (one dot per dendrite). Median lifetime sparseness was not different between groups (Wilcoxon rank sum test,  $z = 0.0073$ ,  $p = 0.99$ ).

n = 198 dendrites before and 185 dendrites after 3 weeks of PLX administration from 3 mice

## Figure 4.1

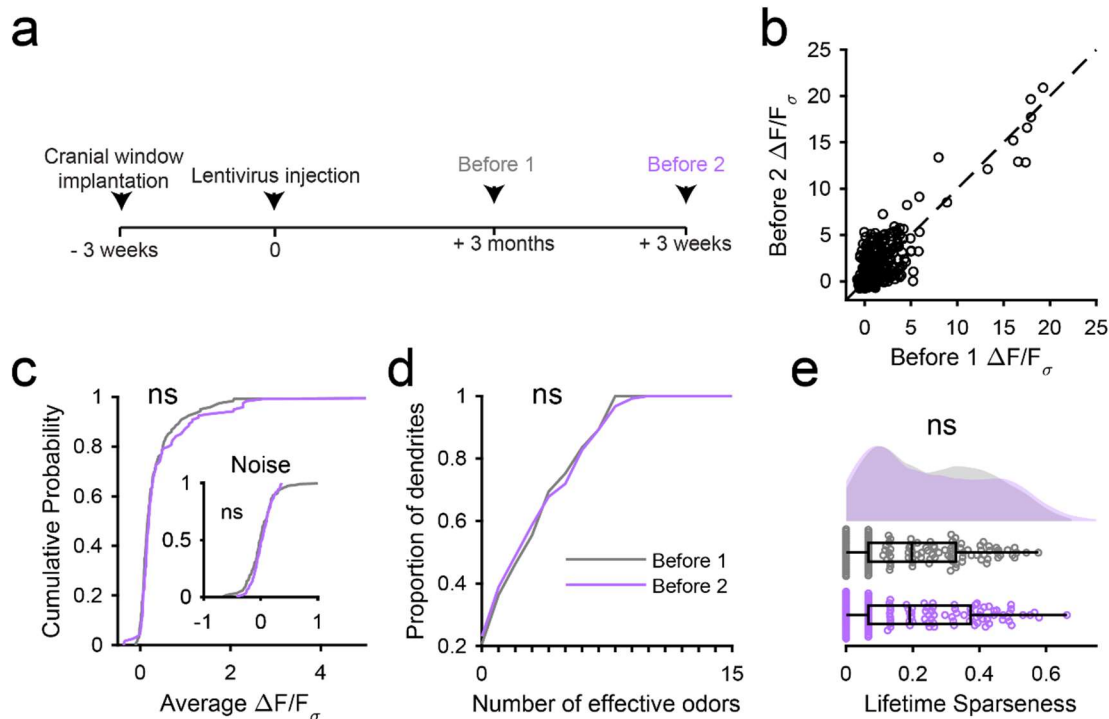

Figure 4 Supplement 1

- Experimental timeline for microglia ablation after development of abGCs. AbGCs were labeled via lentivirus injection and allowed to mature for 3 months. One imaging session was performed and a second was performed 3 weeks later in which the same dendrites were imaged again (the second is the same “Control” imaging session from the main figure).
- Scatterplot showing the responses of all dendrite-odor pairs plotted for the first imaging session compared to the second imaging session. Dotted line is unity. Linear correlation coefficient  $R^2 = 0.73$ ,  $p = 0$ .
- Cumulative distribution showing that the distribution of responses (averaged across odors for each dendrite) is not different between the two imaging sessions (Two sample Kolmogorov–Smirnov test for probability distributions,  $D = 0.097$ ,  $p = 0.61$ ) and the noise distributions constructed from blank trials are also not different ( $D = 0.11$ ,  $p = 0.48$ ).
- Cumulative distribution showing the number of effective odors (odors that evoked responses above the ROC threshold 0.39, which was calculated across all dendrites from both groups). The median number of effective odors was not different between groups (Wilcoxon rank sum test,  $z = 0.20$ ,  $p = 0.84$ ).
- Raincloud plot showing the distribution of lifetime sparseness for all dendrites. Above, kernel density estimate. Below, boxplot showing the median, interquartile range (box), and 1.5 times the interquartile range (whiskers) superimposed on a dot plot of all the data (one dot per dendrite). The median lifetime sparseness values were not significantly different (Wilcoxon rank sum test,  $z = 0.30$ ,  $p = 0.76$ ).

$n = 121$  dendrites from 3 mice (same mice from the main figure)



## Figure 4.2

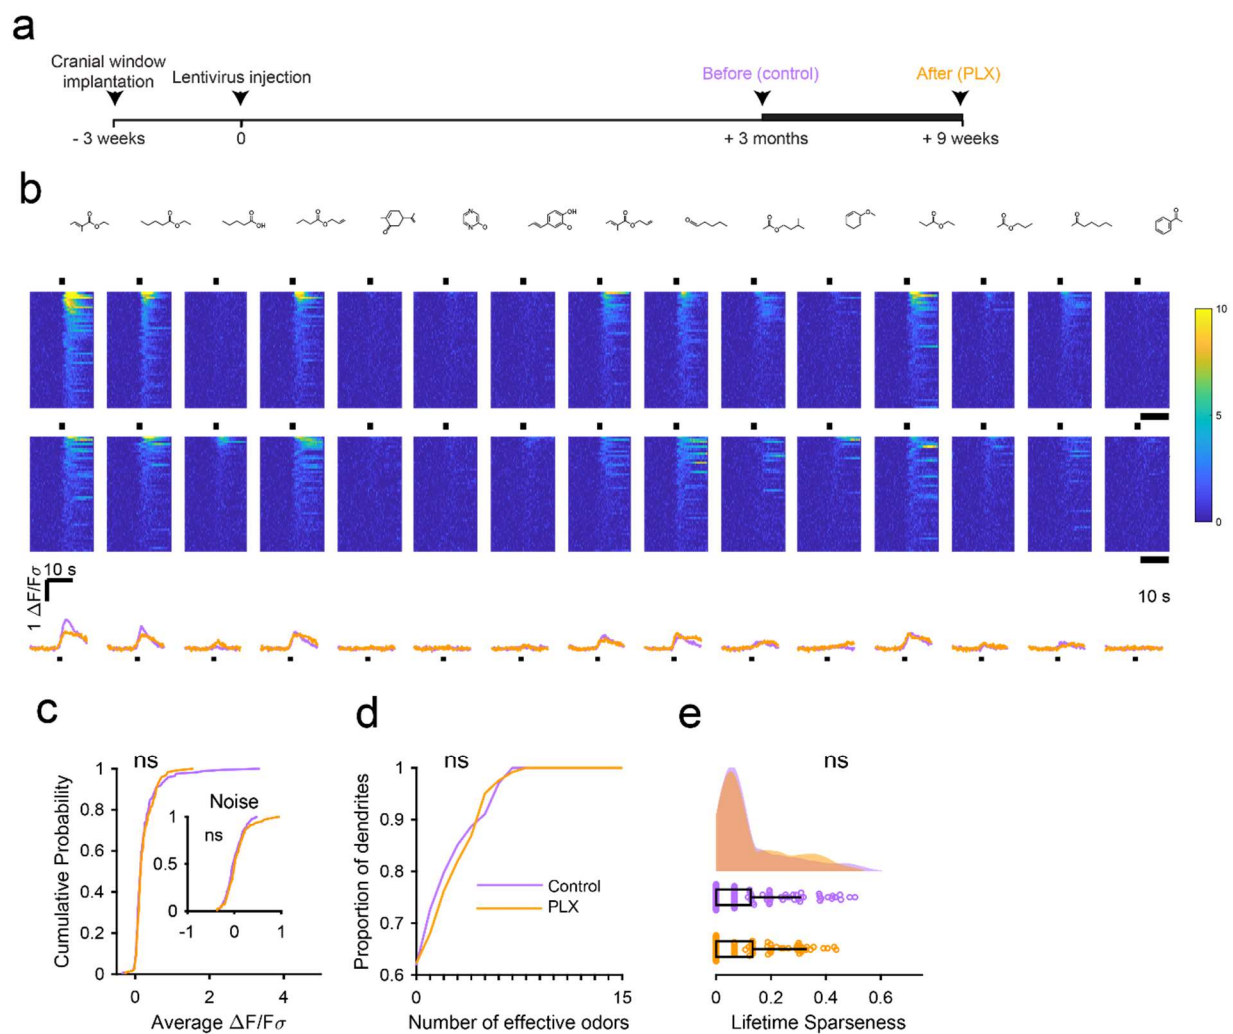

Figure 4 Supplement 2

- Experimental timeline for microglia ablation after development of abGCs. AbGCs were labeled via lentivirus injection and allowed to mature for 3 months. A control imaging session was performed immediately before administration of PLX chow and the second imaging session occurred 9 weeks later.
- Heatmap traces from the 100 ROIs with the largest odor-evoked  $\text{Ca}^{2+}$  signals across all mice ranked for each of 16 odors (molecular structures shown above). Black bar denotes odor time. Bottom, mean response time course for each odor across all ROIs.
- Cumulative distribution showing that the distribution of responses (averaged across odors for each dendrite) is not different before and after PLX diet administration (Two sample Kolmogorov–Smirnov test for probability distributions,  $D = 0.089$ ,  $p = 0.61$ ) and the noise distributions constructed from blank trials are also not different ( $D = 0.14$ ,  $p = 0.095$ ).
- Cumulative distribution showing the number of effective odors (odors that evoked responses above the ROC threshold 0.78, which was calculated across all dendrites from both groups). The

median number of effective odors was not different between groups (Wilcoxon rank sum test,  $z = -0.17$ ,  $p = 0.87$ ).

- e) Raincloud plot showing the distribution of lifetime sparseness for all dendrites in control and PLX-treated mice. Above, kernel density estimate. Below, boxplot showing the median, interquartile range (box), and 1.5 times the interquartile range (whiskers) superimposed on a dot plot of all the data (one dot per dendrite). Median lifetime sparseness was not different between groups (Wilcoxon rank sum test  $z = -0.26$ ,  $p = 0.79$ ).

$n = 168$  dendrites before and  $122$  dendrites after 9 weeks of PLX administration from 3 mice (1 mouse was also included in the 3 weeks group that is shown in the main figure)

## Figure 5

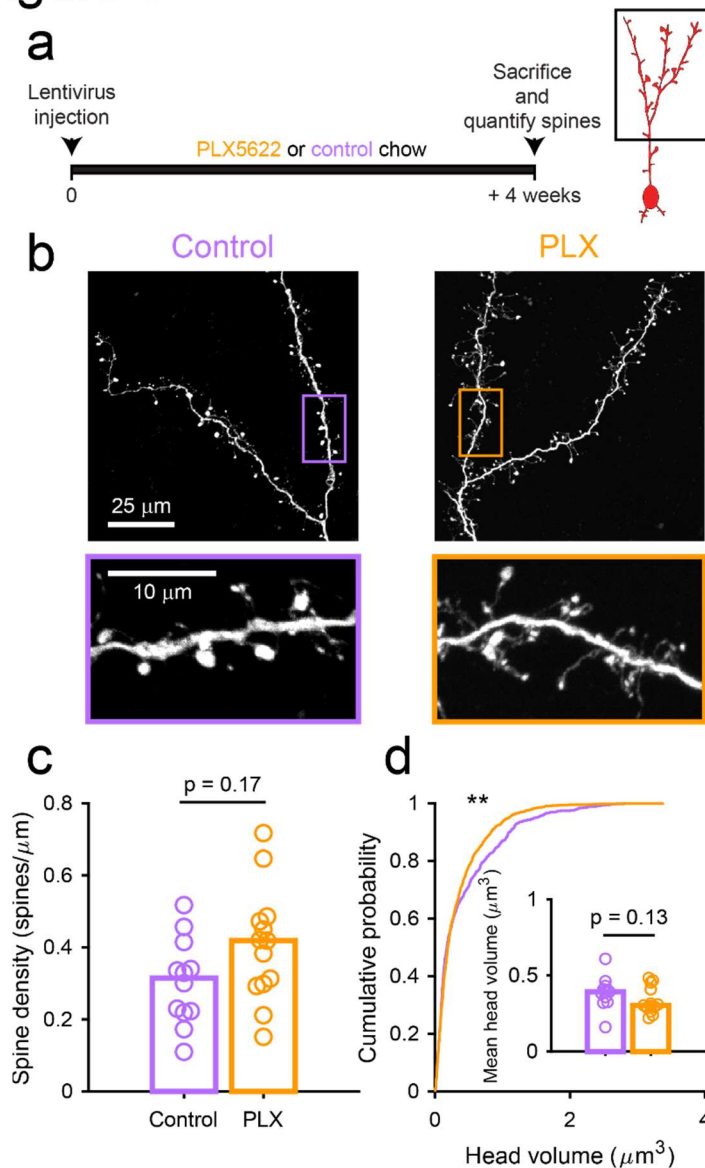

Figure 5: Microglia ablation during development reduces spine head volume in abGCs

- Experimental timeline for microglia ablation during development of abGCs. Mice were given control or PLX5622-containing chow on the same day that a lentivirus was injected into the RMS to label abGCs. Spine numbers and morphology were quantified 4 weeks later.
- Above, sample images showing two apical dendrites from one cell that were analyzed in a control mouse (left) and PLX-treated mouse (right). Below, insets from the images shown above, showing spine morphology in more detail.
- Spine density averaged across 1-5 apical dendrites from each abGC. There was no difference in spine density between the two groups (Wilcoxon rank sum test,  $z = -1.39$ ,  $p = 0.17$ ).
- Cumulative distribution showing the volume of all spines analyzed. The distribution is shifted toward smaller spines in PLX-treated mice (Two sample Kolmogorov–Smirnov test,  $D = 0.080$ ,  $p = 0.0044$ ). Inset, head volume averaged across all spines in each cell. The distributions were not

significantly different when the volume of all spines was averaged per cell (Wilcoxon rank sum test,  $z = 1.50$ ,  $p = 0.13$ ).

Bars indicate medians across cells (circles).

$n = 740$  spines from 12 abGCs from 3 control mice and 1316 spines from 13 abGCs from 4 PLX mice

\*\* $p < 0.01$

## Figure 6

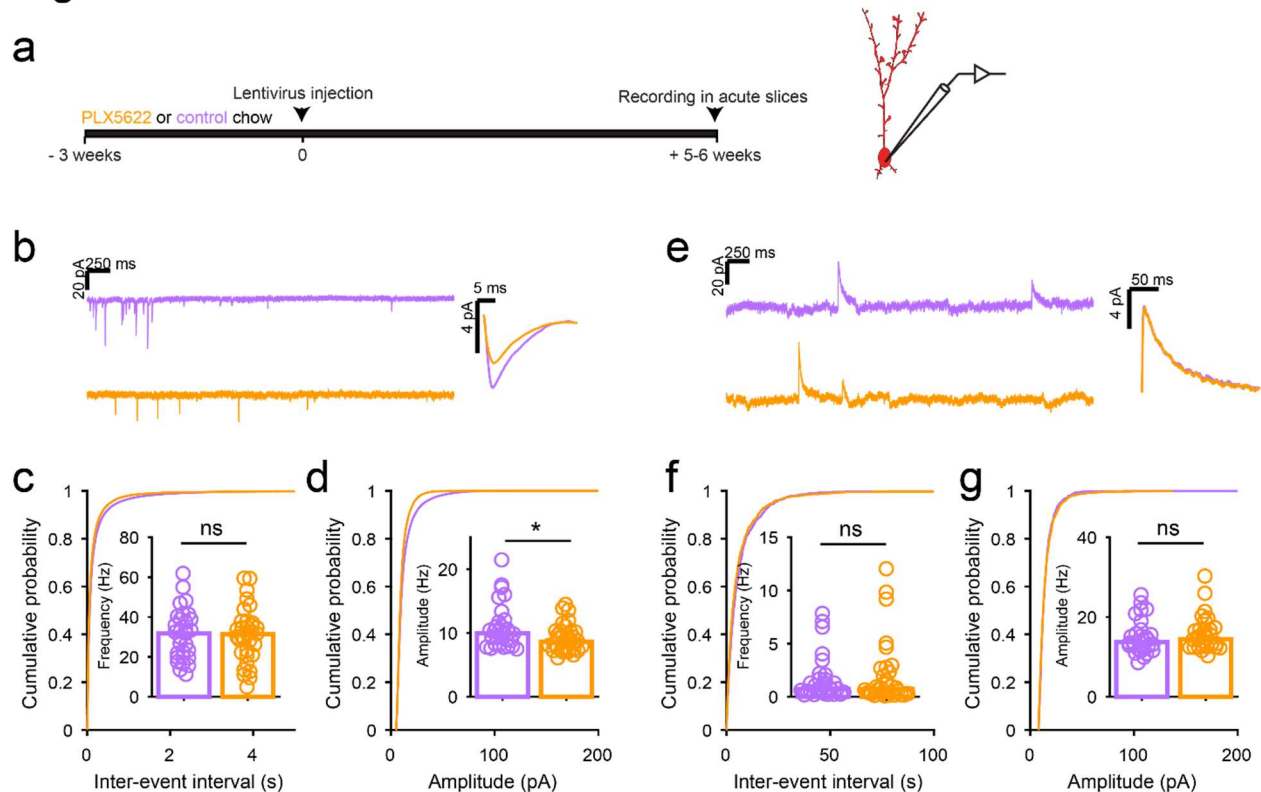

Figure 6: Microglia ablation during abGC development reduces the amplitude of excitatory synaptic currents but does not affect inhibitory synaptic currents

- Experimental timeline for electrophysiological recording in abGCs
- Left, sample sections from raw traces recorded from abGCs in control (top) and PLX-treated (bottom) mice. Right, median EPSCs across all EPSCs detected from all mice.
- Cumulative distribution showing the inter-event intervals from all recorded events. Inset, median frequency for all events from each cell. The distributions were not significantly different when all events were averaged for each cell (Wilcoxon rank sum test,  $z = 0.090$ ,  $p = 0.93$ ).
- Cumulative distribution showing the amplitudes from all recorded events. Inset, median amplitude for all events from each cell. Cells from PLX-treated mice had lower event amplitudes (Wilcoxon rank sum test,  $z = 2.35$ ,  $p = 0.019$ ).
- Left, Sample sections from raw traces recorded from abGCs in control (top) and PLX-treated (bottom) mice. Right, median IPSCs across all IPSCs detected from all mice.
- Cumulative distribution showing the inter-event intervals from all recorded events. Inset, median frequency for all events from each cell. The distributions were not significantly different when all events were averaged for each cell (Wilcoxon rank sum test,  $z = 0.31$ ,  $p = 0.76$ ).
- Cumulative distribution showing the amplitudes from all recorded events. Inset, median amplitude for all events from each cell. The distributions were not significantly different when all events were averaged for each cell (Wilcoxon rank sum test,  $z = -0.85$ ,  $p = 0.39$ ).

Bars indicate medians across cells (circles).

For EPSCs:  $n = 30$  abGCs from 4 control mice and 33 abGCs from 4 PLX mice

For IPSCs: n = 29 abGCs from 4 control mice and 30 abGCs from 4 PLX mice (same mice in both cases and cells used for both EPSCs and IPSCs if the recordings met criteria stated in Methods)

\*p<0.05



## Figure 6.1

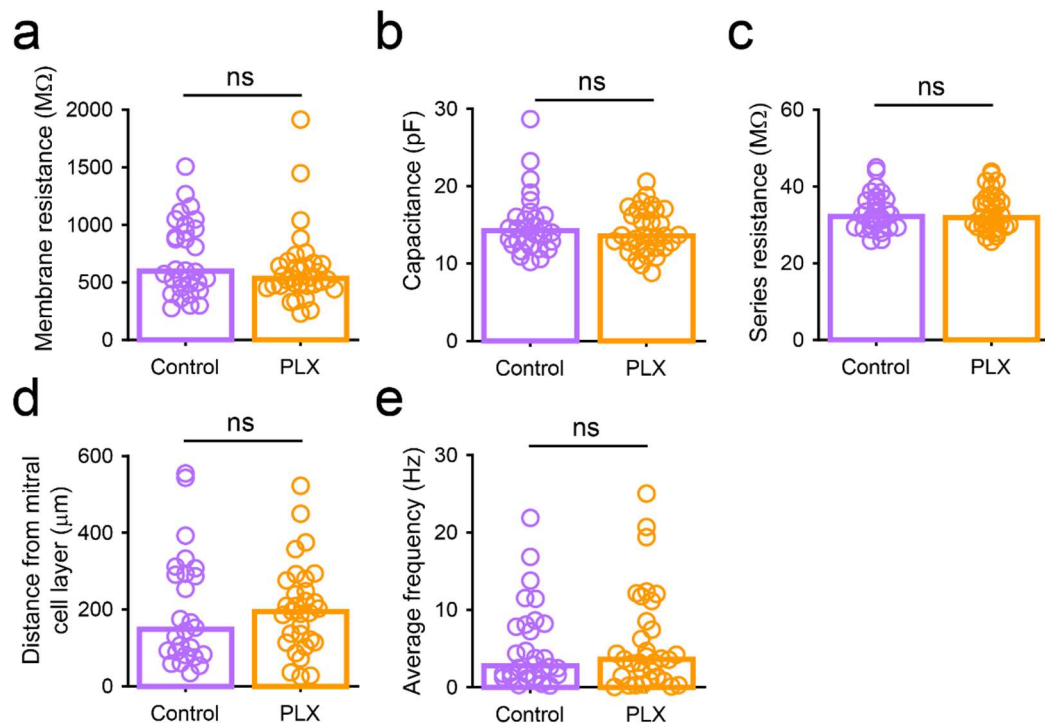

Figure 6 Supplement 1

- Membrane resistance (mean of measurements taken before and after EPSC recordings) in abGCs. There was no difference between the two groups (Wilcoxon rank sum test,  $z = 1.01$ ,  $p = 0.31$ ).
- Membrane capacitance (mean of measurements taken before and after EPSC recordings) in abGCs. There was no difference between the two groups (Wilcoxon rank sum test,  $z = 0.52$ ,  $p = 0.61$ ).
- Series resistance (mean of measurements taken before and after EPSC recordings) during abGC recordings. There was no difference between the two groups (Wilcoxon rank sum test,  $z = 0.048$ ,  $p = 0.96$ ).
- Distance of the cell body from the mitral cell layer (measured in 2D, not taking into account depth from the surface of the slice) for all cells recorded. Both superficial and deep abGCs were included in the dataset and there was no difference in the mean distance to the mitral cell layer between the two groups (Wilcoxon rank sum test,  $z = -0.52$ ,  $p = 0.60$ ).
- Average frequency of EPSCs across the entire recording period in abGCs. There was no difference between groups (Wilcoxon rank sum test,  $z = -0.10$ ,  $p = 0.92$ ).

Bars indicate medians across cells (circles).

$n = 30$  abGCs from 4 control mice and 33 abGCs from 4 PLX mice

## Figure 7

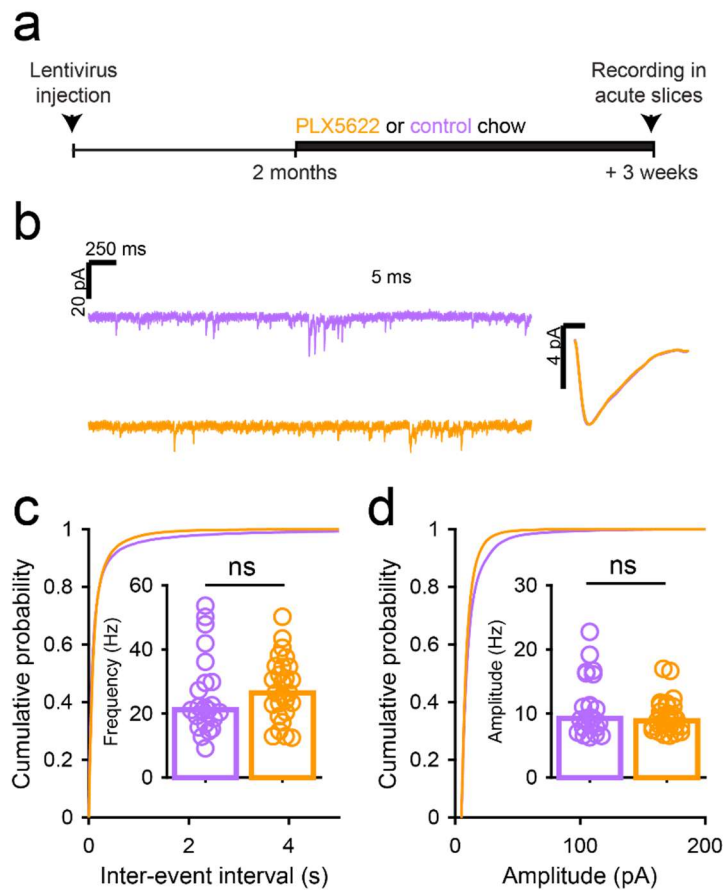

Figure 7: Microglia ablation after abGC development has no effect on excitatory synaptic currents

- Experimental timeline for electrophysiological recordings in abGCs after their development
- Left, Sample sections from raw traces recorded from abGCs in control (top) and PLX-treated (bottom) mice. Right, median EPSCs detected from all mice.
- Cumulative distribution showing the inter-event intervals from all recorded events. Inset, median frequency for all events from each cell. The distributions were not significantly different when all events were averaged for each cell (Wilcoxon rank sum test,  $z = -1.27$ ,  $p = 0.21$ ).
- Cumulative distribution showing the amplitudes from all recorded events. Inset, median amplitude for all events from each cell. The distributions were not significantly different when all events were averaged for each cell (Wilcoxon rank sum test,  $z = 0.41$ ,  $p = 0.68$ ).

Bars indicate medians across cells (circles).

$n = 23$  abGCs from 3 control mice and 27 abGCs from 3 PLX mice

\* $p < 0.05$

## Figure 7.1

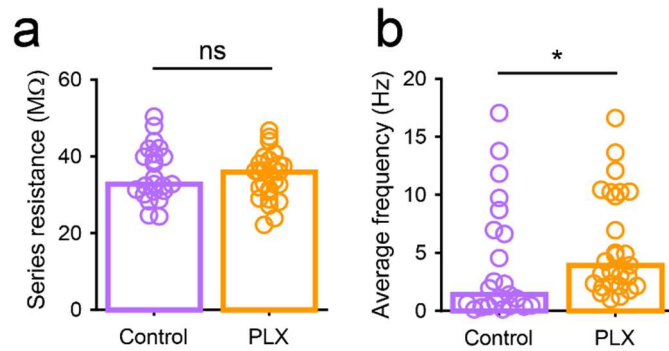

Figure 7 Supplement 1

- Series resistance (mean of measurements taken before and after EPSC recordings) during abGC recordings. There was no difference between the two groups (Wilcoxon rank sum test,  $z = 0.27$ ,  $p = 0.79$ ).
- Average frequency of EPSCs across the entire recording period in abGCs. There was a higher average EPSC frequency in PLX-treated mice (Wilcoxon rank sum test,  $z = -2.32$ ,  $p = 0.02$ ).

Bars indicate medians across cells (circles).

$n = 30$  abGCs from 4 control mice and 33 abGCs from 4 PLX mice

\* $p < 0.05$

## Figure 7.2

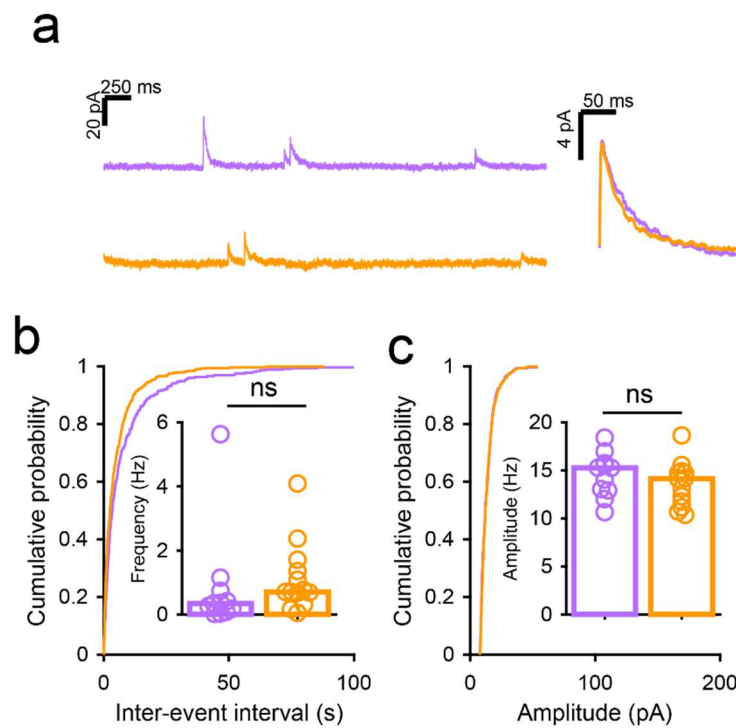

Figure 7 Supplement 2

- Left, Sample sections from raw traces recorded from abGCs in control (top) and PLX-treated (bottom) mice. Right, median IPSCs calculated across all IPSCs detected from all mice.
- Cumulative distribution showing the inter-event intervals from all recorded events. Inset, median frequency for all events from each cell. The distributions were not significantly different when all events were averaged for each cell (Wilcoxon rank sum test,  $z = -1.62$ ,  $p = 0.10$ ).
- Cumulative distribution showing the amplitudes from all recorded events. Inset, median amplitude for all events from each cell. The distributions were not significantly different when all events were averaged for each cell (Wilcoxon rank sum test,  $t = 1.10$ ,  $p = 0.27$ ).

Bars indicate medians across cells (circles).

$n = 11$  abGCs from 3 control mice and 13 abGCs from 3 PLX mice

Video 1. Z stack showing microglia and abGC dendrites. Movie showing the entire field of view at the beginning of the imaging session for the example shown in Figure 1. The z stack volume spans 29  $\mu\text{m}$  and was taken at 32 dpi. The analysis in Figure 1 was performed on individual planes from such z stacks.

Video 2. Time series showing interactions between microglia and dendritic spines of abGCs. Movie showing a single plane taken from the z stack in Video 1 across 48 minutes of imaging (images taken 3 minutes apart). The time course of the interaction between a microglial process and the mushroom spine shown in the example in Figure 1 can be observed. The analysis in Figure 1 was performed on individual planes from such time series.
